# Supplementary material
Source: PubMed Central journal article supplement (PMC7269565)
Supplement: jci-130-130206-s223.pdf [file jci-130-130206-s223.pdf]

## Supplementary Appendix

### Table of Contents

|                                                                                                                                                                                                                             |    |
|-----------------------------------------------------------------------------------------------------------------------------------------------------------------------------------------------------------------------------|----|
| The Index Family .....                                                                                                                                                                                                      | 4  |
| DNA isolation.....                                                                                                                                                                                                          | 4  |
| Linkage analysis to 14q .....                                                                                                                                                                                               | 5  |
| MLPA assay .....                                                                                                                                                                                                            | 5  |
| <i>DICER1</i> screening.....                                                                                                                                                                                                | 5  |
| Variant calling in germline samples subjected to whole exome sequencing (WES).....                                                                                                                                          | 5  |
| Variant calling in somatic samples subjected to WES .....                                                                                                                                                                   | 5  |
| RNA seq analysis and normalization.....                                                                                                                                                                                     | 6  |
| Consensus Clustering .....                                                                                                                                                                                                  | 7  |
| Gene Set Enrichment Analysis (GSEA) .....                                                                                                                                                                                   | 7  |
| Supplementary Figures .....                                                                                                                                                                                                 | 8  |
| Supplementary Figure 1. Magnetic Resonance imaging of the schwannomas in the index family.....                                                                                                                              | 8  |
| Supplementary Figure 2. Histology of the tumors in the index family .....                                                                                                                                                   | 10 |
| Supplementary Figure 3. Conservation of c.1552G across species .....                                                                                                                                                        | 12 |
| Supplementary Figure 4. Analysis of expression of <i>DGCR8</i> mutated allele c.1552G>A;p.E518K.....                                                                                                                        | 13 |
| Supplementary Figure 5. Genome-wide Allelic Imbalance (LOH) analyses in Schwannomas, Choroid Plexus Papilloma, Papillary Thyroid Cancer and Wilms Tumors bearing <i>DGCR8</i> -c.1552G>A;p.E518K.....                       | 14 |
| Supplementary Figure 6. Genome-wide copy number analysis using SNP-arrays (OncoScans) in MNGs of individuals II-2, III-1, III-2, III-3 and in the two PTC samples with the c.1552G>A;p.E518K mutation in <i>DGCR8</i> ..... | 15 |
| Supplementary Figure 7. Functional in silico characterization of the c.1552G>A, p.E518K variant in <i>DGCR8</i> .....                                                                                                       | 17 |
| Supplementary Figure 8. Consensus clustering of miRNA expression analysis in the Schwannoma and Wilms Tumor datasets.....                                                                                                   | 18 |
| Supplementary Figure 9. Multidimensional scaling visualization of miRNA expression in <i>DGCR8</i> -c.1552G>A;p.E518K mutated tumors and their wild type counterparts.....                                                  | 19 |
| Supplementary Figure 10. Comparison among the differential expression analysis in the Schwannoma and Wilms Tumor datasets.....                                                                                              | 20 |
| Supplementary Figure 11. Pre-miRNA clustering of <i>DGCR8</i> -c.1552G>A;p.E518K mutated tumors and their wild type counterparts .....                                                                                      | 21 |

|                                                                                                                                                                                    |    |
|------------------------------------------------------------------------------------------------------------------------------------------------------------------------------------|----|
| Supplementary Figure 12. Pre-miRNA Differential Expressed (DE) analysis of tumors with or without <i>DGCR8</i> mutation .....                                                      | 21 |
| Supplementary Figure 13. In vitro cleavage with pri-miR-223 .....                                                                                                                  | 22 |
| Supplementary Figure 14. miRNA Differential Expressed (DE) analysis of tumors with or without <i>DICER1</i> mutation .....                                                         | 23 |
| Supplementary Figure 15. Gene Set Enrichment Analysis of <i>DGCR8</i> mutated vs. wild type Schwannomas .....                                                                      | 24 |
| Supplementary Figure 16. Chromosomal location of <i>DGCR8</i> , <i>LZTR1</i> , <i>SMARCB1</i> and <i>NF2</i> along Chr22 .....                                                     | 25 |
| Supplementary Figure 17. Genotype-phenotype association of previously described mutations in the literature and public databases .....                                             | 26 |
| Supplementary Tables .....                                                                                                                                                         | 28 |
| Supplementary Table 1. Germline variants of index family (WES) (family segregation) .....                                                                                          | 28 |
| Supplementary Table 2. Coverage data for the WES experiment in the germline of 9 members of the family .....                                                                       | 29 |
| Supplementary Table 3. Loss of heterozygosity (LOH) summary in tumors of the index family .....                                                                                    | 29 |
| Supplementary Table 4. Somatic mutations found by WES in 5 schwannomas from index family individuals (4 schwannomas from individual II-2, 1 schwannoma from individual I-1) ..     | 30 |
| Supplementary Table 5. Somatic mutations found by WES in the choroid plexus papilloma from individual III-1 .....                                                                  | 31 |
| Supplementary Table 6. Coverage results for the WES experiment in the 6 tumors (4 schwannomas from individual II-2, 1 schwannoma from individual I-1 and 1 CPP from III-1) ..      | 34 |
| Supplementary Table 7. Summary of the Sequencing Methods for all Tumors and blood from MNG patients .....                                                                          | 34 |
| Supplementary Table 8. <i>DGCR8</i> Sequencing Summary of <i>DGCR8</i> (NM_022720) for all sporadic CPTs and schwannomas .....                                                     | 35 |
| Supplementary Table 9. Differentially expressed miRNAs in <i>DGCR8</i> mutated vs <i>DGCR8</i> wild type schwannomas .....                                                         | 36 |
| Supplementary Table 10. Differentially expressed mRNAs in <i>DGCR8</i> mutated vs <i>DGCR8</i> wild type schwannomas .....                                                         | 37 |
| Supplementary Table 11. Differentially expressed miRNAs in <i>DGCR8</i> mutated vs <i>DGCR8</i> wild type Wilms Tumors .....                                                       | 38 |
| Supplementary Table 12. Proportions of mirtrons within the total miRNA populations in <i>DGCR8</i> or <i>DICER1</i> mutated tumors compared to their wild types counterparts ..... | 40 |
| Supplementary Table 13. Hallmark gene set enrichment analysis for differentially expressed transcripts in <i>DGCR8</i> mutated vs <i>DGCR8</i> wild type schwannomas .....         | 40 |

Supplementary Table 14. Primers used for amplification and sequencing of *DGCR8* gene in DNA of FFPE samples. cDNA-specific primers for amplification and sequencing of the E518K variant in cDNA are included at the bottom of the table .....41

## Supplementary Methods

### The Index Family

In the index family, six cases of histopathologically-confirmed multinodular goiters (MNGs) occurred with 3 cases of histopathologically-confirmed schwannomas and 2 cases of imaging-confirmed schwannomas:

First generation: In the 85-year old grandfather (I-1) a MNG was diagnosed and partial thyroidectomy was performed at the age of 29 followed by a total thyroidectomy at 47 y/o. A schwannoma of the pinna was diagnosed 33 years later (70 y/o).

Second Generation: The proband (II-1) was also diagnosed with a MNG for which he had a total thyroidectomy at the age of 18. Ten years later a colloid goiter regrowth prompted a total thyroidectomy (details are provided in Figure 1). Person II-2 had a MNG, a mature cystic teratoma, multiple peripheral schwannomas (9 up to date), a mature cystic teratoma and an ovarian serous cystadenofibroma in the contralateral ovary. She had a total thyroidectomy when she was 20 years old and over the next 18.5 years had a midline neck regrowth exhibiting solid and cystic nodular thyroid tissue. At the age of 49, she had a complete thyroidectomy. This patient also had a right salpingo-oophorectomy at the age of 18 to excise the mature cystic teratoma and later had a left salpingo-oophorectomy at age 26 to excise the ovarian serous cystadenofibroma. The archival tissue from the ovarian tumors did not pass quality requirements for genomic analysis. Person II-2 was diagnosed with a schwannoma around her left femoral nerve and underwent surgeries at the ages of 20 and 23 to get it excised. At 43 years old, she underwent surgery to excise a schwannoma located in the right axilla. She was again diagnosed with three schwannomas in her left foot and a single schwannoma around the right common peroneal nerve at the age of 54, for which she underwent surgery at the same age to have them all excised. Early in 2018, she was diagnosed with 3 schwannomas in the neck region (Supplementary Figure 1).

Third generation: Patients III-1, III-2 and III-3 each had a total thyroidectomy at the ages of 23, 18 and 21, respectively. III-1 was diagnosed with a form of autism and also had brain surgery at the age of 7 years to excise a choroid plexus papilloma (WHO I). III-1 and III-3 were diagnosed with multiple schwannomas. III-1 was diagnosed at the age of 25 with three schwannomas located in the left elbow region that could have been present for some years. III-3 was diagnosed at the age of 23 with two schwannomas: one in the left wrist and one in the right shoulder that also could have been present for some years and were both excised a year and a half later. III-2 was diagnosed at the age of 27 with a single schwannoma located in the right knee and resected one year later. Individual III-4 died from a car accident at the age of 17 years old.

Schwannoma symptomatology: Individual III-1 showed signs of intense pain to palpation of his schwannoma. Since we first identified these familial schwannomas, family members are referring discomfort, tenderness and paresthesias localized to the tumor and radiating along nerve of origin although no individuals complained of overt pain related to their schwannomas.

### DNA isolation

Germline DNA from members of the index family (n = 9) and from cases of MNGs with a suspected hereditary origin (n = 18) was isolated from blood using Gentra Puregene Blood kit (Qiagen, California, USA) following the manufacturer's instructions. Tumor DNA from fresh frozen samples (n = 7) was isolated with DNeasy Blood and Tissue Qiagen kits (Qiagen, California, USA). Tumor DNA from sporadic CPT cases (n = 74), schwannoma cases (n = 181)

and family 1 cases (n = 7) was isolated from formalin-fixed, paraffin-embedded (FFPE) material using the Maxwell 16 FFPE tissue RSC DNA purification Kit (Promega, Wisconsin, USA) in accordance with the manufacturer's protocol. DNA from 315 thyroid cancer and 106 benign nodules was extracted from fine needle aspiration (FNA) biopsies using QIAamp DNA Mini Kit (Qiagen, Hilden, Germany).

### **Linkage analysis to 14q**

Polymorphic microsatellite repeat markers located at 14q32 (D14S1010, D14S267, D14S62, D14S1455, D14S265, D14S1030, D14S1054 and D14S274) were used for haplotype analysis as described by Rudkin and colleagues(1).

### **MLPA assay**

We screened the germline of the proband and of the 18 familial MNGs for deletions or duplications of *DICER1* using an in-house multiplex ligation-dependent probe amplification (MLPA) assay, as described previously(2).

### ***DICER1* screening**

Germline DNA from the index family was screened for the full *DICER1* coding region and exon-intron boundaries in germline DNA from the index family using a custom Fluidigm Access Array (Fluidigm, California, USA) which targets all exons and exon-intron boundaries of *DICER1*, as previously described(3).

### **Variant calling in germline samples subjected to whole exome sequencing (WES)**

Bioinformatics analysis of exome sequencing data was performed using our WES pipeline as previously described(4). Briefly, our pipeline uses Trimmomatic (v.0.35) and BWA (v. 0.5.9) to trim and align sequenced reads to the reference genome (hg19); GATK and Picard (<http://broadinstitute.github.io/picard/>) to perform local realignment around small insertions and deletions (indels) and to mark read duplicates, respectively.

Next, GATK was applied to assess capture efficiency and coverage for all samples. A mean coverage of 139-fold (ranging from 90-238-fold) was obtained for all consensus coding sequence (CCDS) in germline samples and 98% and 97% of CCDS bases were covered by at least 5 and 20 reads, respectively (Supplementary Table 1).

Single nucleotide variants (SNVs) and indels were called using Samtools and subsequently annotated by ANNOVAR(5). Those variants which most likely damage the protein (nonsense, canonical splice-site, coding indels and missenses) were considered for further analysis. To remove common variants and false positive calls, candidate mutations were subjected to several filtering steps and eliminated if they fulfilled any one of the following criteria: (i) genomic position of variant covered by <5-reads, (ii) <5 reads supported the alternative variant, (iii) variant had allelic ratio <10% for SNVs or <15% for indels, (iv) variant had allele frequency >0.001 in NoTCGA-ExAC databases (release 0.3 2016-01-13), or seen as homozygote in ExAC database (release 0.3 2016-01-13) (v) missense variants that were not predicted to be disease causing by 3 out of 6 bioinformatic algorithms (SIFT, PolyPhen, MutationTaster, Revel, MCAP and CADD)(6-11). Finally, The Integrative Genomics Viewer was used for the manual examination and visualization of all potential candidate variants(12).

### **Variant calling in somatic samples subjected to WES**

Bioinformatics analysis of exome sequencing data was performed using our WES pipeline as described above. GATK was applied to assess capture efficiency and coverage for all samples. A mean coverage of 161-fold (ranging from 93-196-fold) was obtained for all consensus coding sequence (CCDS) in samples and 98 % and 96% of CCDS bases were covered by at least 5 and 20 reads, respectively (Supplementary Table 2).

Potential somatic substitutions, single nucleotide variants (SNVs) and indels, were called using Mutect (see <https://confluence.broadinstitute.org/display/CGATools/MuTect> for method) and IndelLocator (see <https://confluence.broadinstitute.org/display/CGATools/Indelocator> for methods) on the basis of BWA alignments and were then annotated with ANNOVAR(5). Those variants most likely to damage the protein (nonsense, canonical splice-site, coding indels and missense) were considered for further analysis. To remove common variants and false positive sequencing artifacts, candidate somatic mutations were subjected to several filtering steps and eliminated if they fulfilled any one of the following criteria: (i) genomic position of variant covered by <5-reads, (ii) <5 reads support the alternative variant, (iii) variant has allelic ratio <10% for SNVs or <15% for indels, (iv) variant has allele frequency >0.001 in TCGA-ExAC databases (release 0.3 2016-01-13) or seen as homozygote in ExAC database (build). (v) missense variants that were not predicted to be disease causing by 3 out of 6 bioinformatic algorithms (SIFT, PolyPhen, MutationTaster, Revel, MCAP and CADD)(6-11). Finally, The Integrative Genomics Viewer was used for the manual examination and visualization of all potential candidate variants(12).

### **RNA seq analysis and normalization**

MicroRNA libraries were sequenced using Illumina HiSeq 2500 with 50-bp read length. Adapters and low quality bases were trimmed using cutadapt(13) and trimmed reads with length >16 were kept. The average high quality read counts were 34M (ranging from 21M to 51M). For quality control, FASTQC (version v0.11.5)(14) was run on all samples. Reads were mapped to the human genome (hg19) using the bowtie version 1.1.2(15). The feature Counts tool from the Subread(16) was used to generate counts of reads mapped to the mature miRNA of miRBase (v20 with genome-build GRCh37.p5). Counts for each sample were combined and loaded into the R statistical environment (<https://cran.r-project.org>, version 3.4.3). Differential analysis was performed using various packages from the Bioconductor project(17), including edgR(18) and LIMMA(19). Briefly, transcripts with low counts were filtered by a counts per million (CPM) cutoff. The cutoff value was determined by finding the CPM (minimum 10 reads, across at least 4 samples). The data was normalized for sequencing depth using the weighted Trimmed Mean of M-values method as implemented in the calcNormFactors function of the edgR (method = TMM). Then logCPM transformation and mean-variance relationship estimation was performed using the VROOM function of limma package(19). Differential expression analysis was conducted by linear modelling on the normalized data for the comparison in question (group effect = the *DGCR8* mutation). Empirical Bayes moderation was applied, which gives a more precise estimation of gene-wise variability (eBayes function of limma).

The same analysis was performed on pre-miRNA raw reads with two differences. Adapters and low quality bases were trimmed using cutadapt(13) and trimmed reads with length >30 were kept. The average high quality read counts were 130M (ranging from 97M to 232M). In addition, the cutoff for the low counts transcripts was a minimum of 1 read, across at least 4 samples. Total RNA libraries were sequenced using Illumina HiSeq 4000 with paired-end 100-bp read length. Adapters and low quality bases were trimmed using Trimmomatic(21). The trimmed reads were aligned to the reference genome (hg19) using STAR in a two-passes approach. The average properly aligned paired reads was 125M (93M to 152M). The counts of read pairs overlapping genes was determined using htseq-count (22), with low counts filtered by a CPM cutoff (minimum 10 reads, across 4 samples). VROOM normalization was performed(20) and a linear model was applied on the normalized data for the comparison in question. Differential

analysis statistics were computed using moderated t-statistics as implemented in the LIMMA package(19).

### **Consensus Clustering**

Unsupervised consensus clustering was performed in order to evaluate the clustering of DGCR8-mutant samples and their wild type counterparts (n sample = 33), based on their normalized miRNA profile, using the ConsensusClusterPlus R package(23). The clustering was evaluated for 2 up to 5 clusters ( $k = 2$  to 5), with 1000 repetitions. Consensus distributions for each  $k$  is shown using empirical Cumulative Distribution Function (CDF) plot (Supplementary Figure 8A). As the CDF plot clearly shows, the 2-cluster solution performs best with lowest Proportion of Ambiguous Clustering (PAC). Consensus membership matrix for 2-cluster solution ( $k = 2$ ) is shown using a heatmap in Supplementary Figure 8B. ConsensusClusterPlus was run with default parameters and minor modifications as followings: number of resampling = 1000;  $pltem = 0.8$  ( resampling for samples);  $clusterAlg = 'hc'$  (heirarchical, hclust algorithm);  $maxK = 5$  (maximum cluster number to evaluate);  $pFeature = 0.8$  (Proportion of miRNA to sample); The normalization of miRNA values was performed as explained above for differential expression analysis. In addition, as clustering performed on samples from public data as well as our data (Wilms and Schwannoma; n smaple = 24 and 9 respectively), data was also normalized for this effect using the `removeBatchEffect` function in the R limma package.

### **Gene Set Enrichment Analysis (GSEA)**

We performed Gene Set Enrichment Analysis(24), based on comparison between DGCR8-mutated and wild type schwannomas, using 50 Hallmark Gene Sets(25). We reported the gene sets with FDR less than 0.01 ( $NES > 1.9$  or  $NES < -1.9$ ). This led to 5 significantly enriched gene sets (out of 50). Results are shown in Supplementary Figure 15 and Supplementary Table 13.

## Supplementary Figures

Supplementary Figure 1. Magnetic Resonance imaging of the schwannomas in the index family

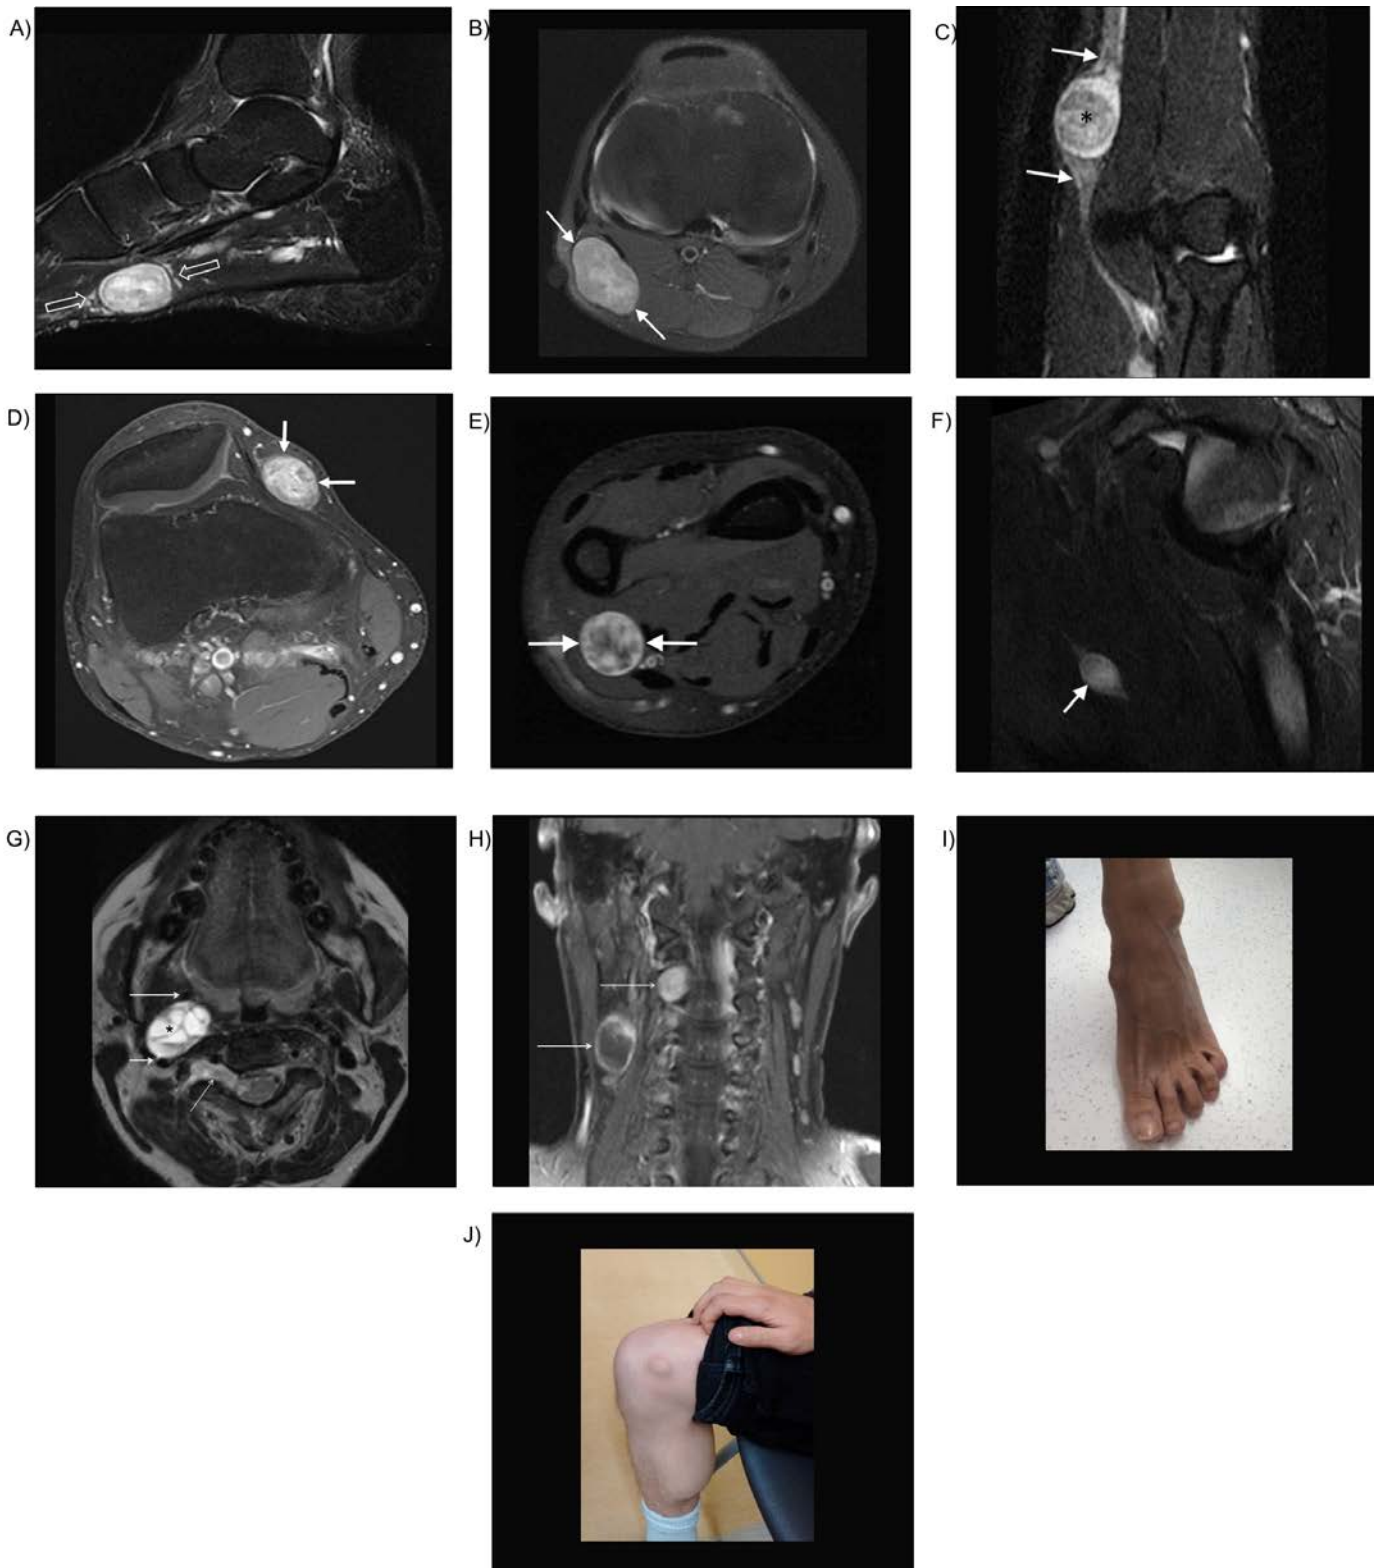

**Supplementary Figure 1.** (A) Sagittal STIR image shows an ovoid, heterogeneous mass in the distribution of the posterior tibial nerve. The lesion demonstrates a hyper intense rim, which is not specific, but which can be seen in the setting of schwannoma (open arrows) from a 54 year old female with schwannomas (II-2). (B) Axial fat-saturated proton density image at the knee in the same patient shows a heterogeneously hyper intense mass at the posterolateral knee in the region of the common peroneal nerve (white arrows) from a 54 year old female with schwannomas (II-2). (C) 25 year old male with schwannoma along the median nerve: Coronal Short Tau Inversion Recovery (STIR) image shows a well-circumscribed, heterogeneous mass (asterisk). Note the slightly eccentric relationship to the median nerve (white arrows) from III-1. (D) 27 year old male with schwannoma: Axial T1 fat-saturated image post contrast shows an ovoid, heterogeneously enhancing mass at the anteromedial knee (white arrows) from III-2. (E) Oblique sagittal STIR image demonstrates a fusiform high-signal mass within the right pectoralis major muscle (arrow) from 23 year old female with schwannoma III-3. (F) T1 fat-saturated image post contrast in the same patient at the level of the wrist demonstrates a heterogeneous, well marginated mass in the volar soft tissues medially (arrows). The lesion shows heterogeneous enhancement from 23 year old female (III.3) with schwannoma. (G) Axial T2-weighted image from a 56 year old female with schwannomas (II-2) demonstrates a heterogeneously hyper intense schwannoma (asterisk) at the carotid bifurcation splaying the internal (short arrow) and external (long arrow) carotid arteries. A second schwannoma is seen widening the right C2-C3 neural foramen (thin arrow) with mild mass effect upon the spinal cord. (H) Coronal T1-weighted image with contrast again shows the lesion at the C2-C3 neural foramen which appears enhancing with slight heterogeneity (thin arrow). A third schwannoma from a 56 year-old female with schwannomas (II-2) is demonstrated subjacent to the right sternocleidomastoid muscle (thick arrow), showing peripheral enhancement with central cystic degeneration. (I) Photograph of the schwannoma in the left foot of II-2. (J) Photograph of the schwannoma in the right knee of II-2.

## Supplementary Figure 2. Histology of the tumors in the index family

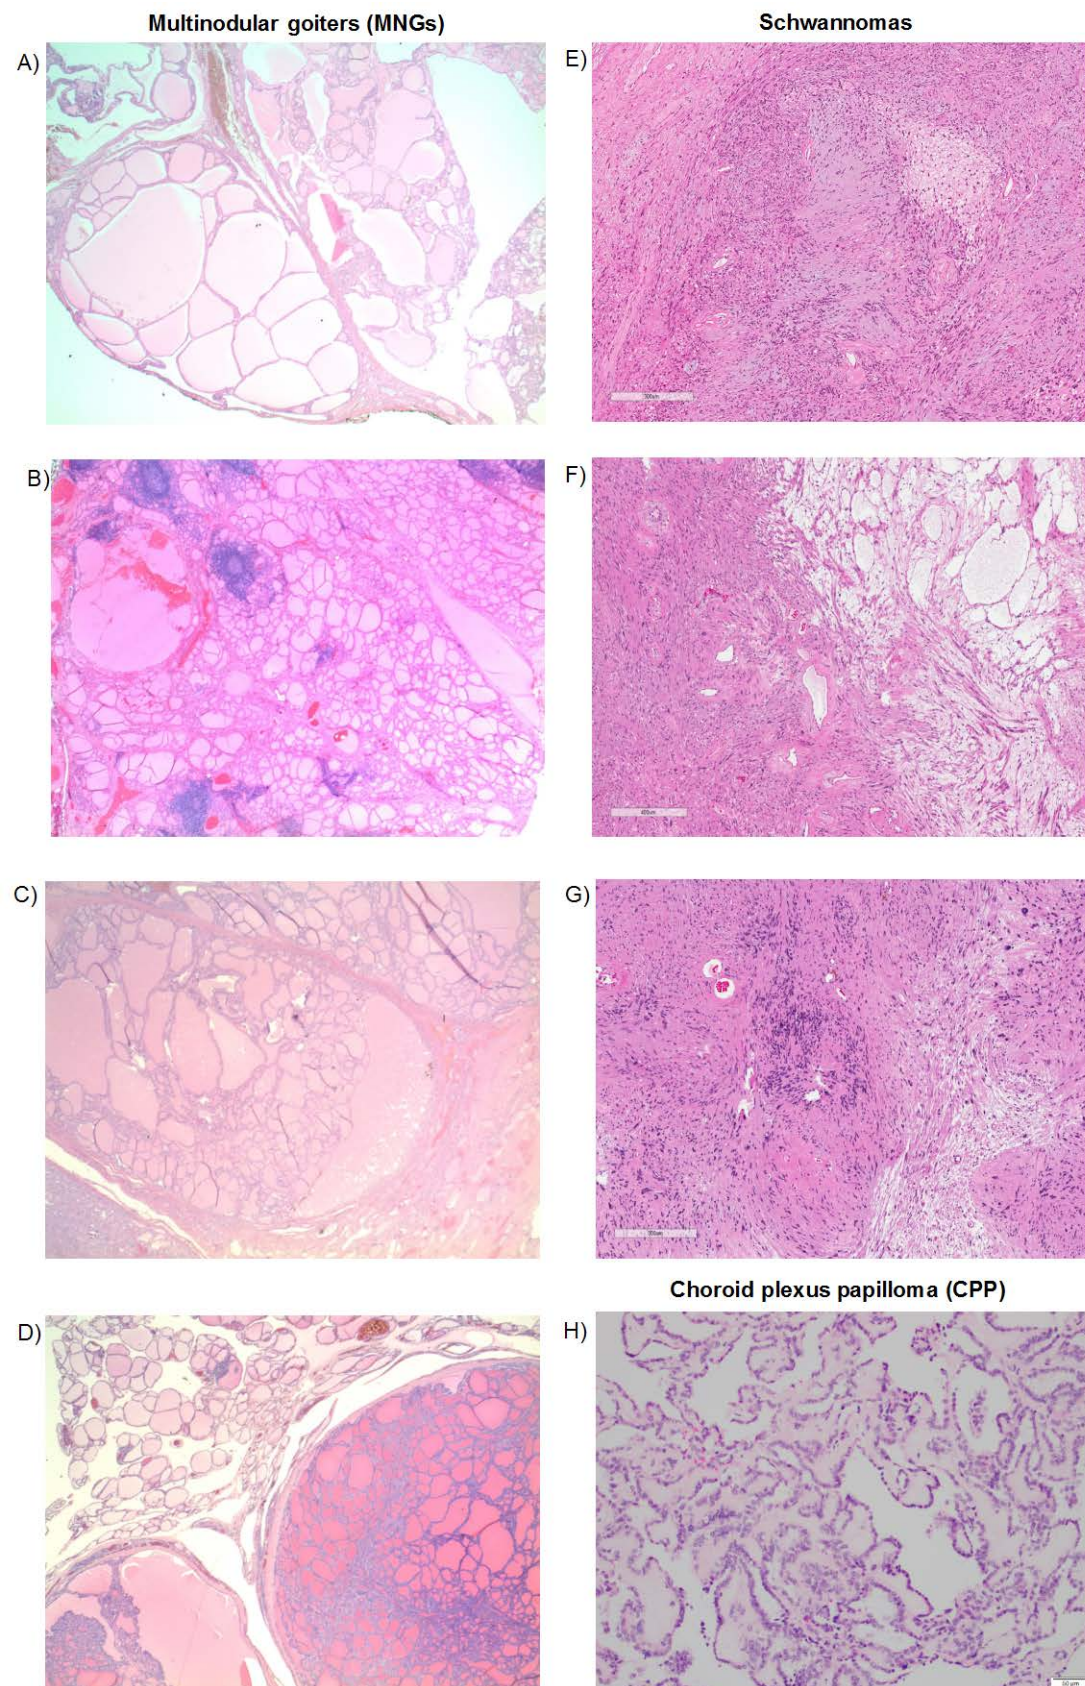

**Supplementary Figure 2. (A-D)** Representative images of H&E stained multinodular goitre (MNG) of the proband (II-1), individuals III-1, III-2 and III-3, respectively. Original magnification, 20X. **(E-G)** Representative images of H&E stained schwannomas of persons II-2, III-2 and I-1, respectively. Scale bars: 400  $\mu$ m, 300  $\mu$ m, 300  $\mu$ m. **(H)** Representative image of H&E stained choroid plexus papilloma (CPP) of individual III-1. Scale bar: 50  $\mu$ m.

### Supplementary Figure 3. Conservation of c.1552G across species

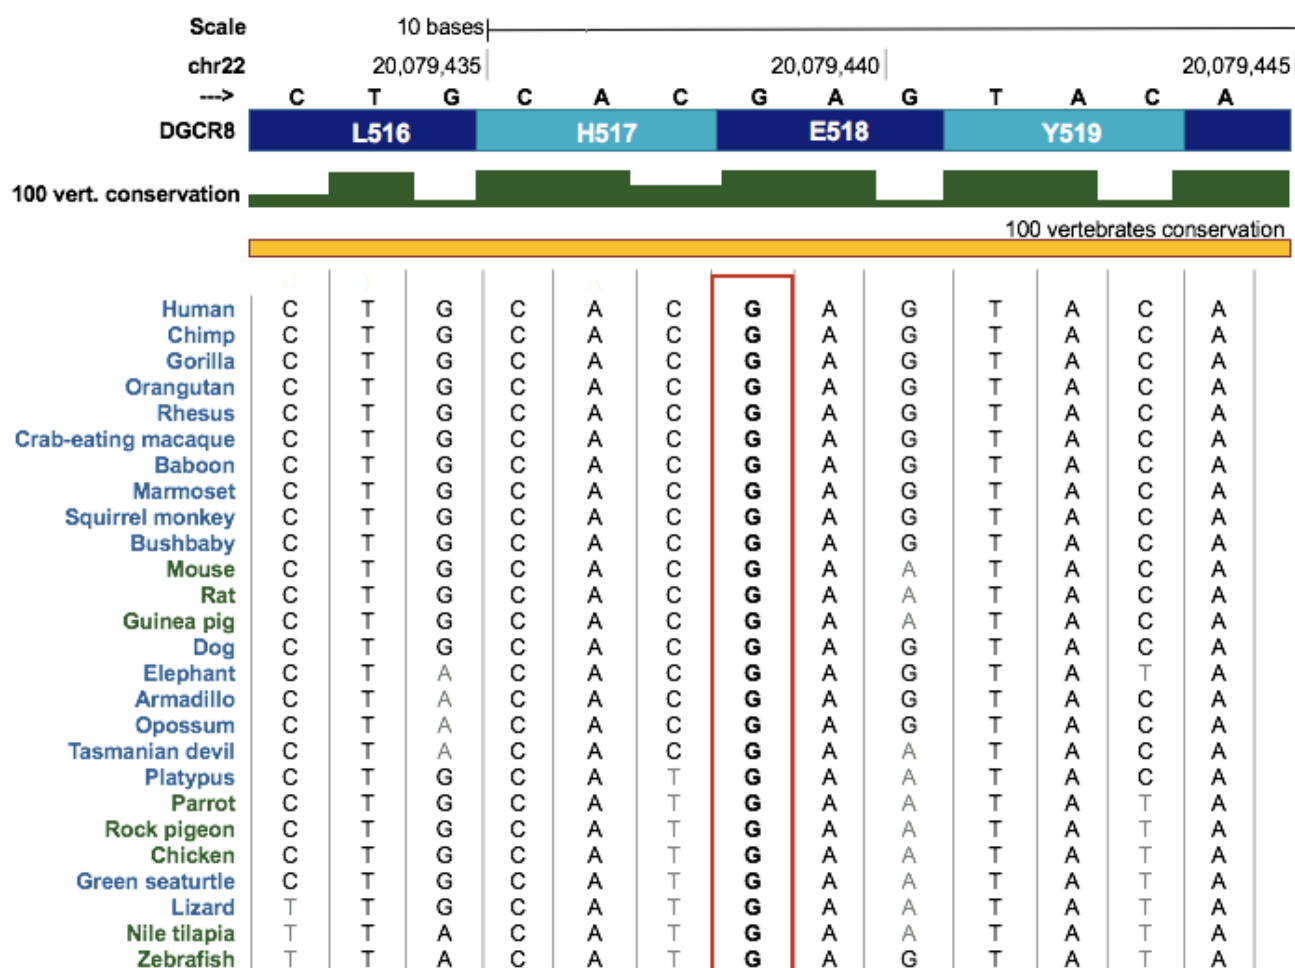

**Supplementary Figure 3.** Nucleotide position c.1552G (corresponding to the first base pair of codon 518, highlighted in a red box) is highly conserved among species of vertebrates. Data was obtained through the UCSC genome browser ([www.genome.ucsc.edu](http://www.genome.ucsc.edu)) based on (GRCh37/hg19) assembly.

**Supplementary Figure 4. Analysis of expression of *DGCR8* mutated allele c.1552G>A;p.E518K**

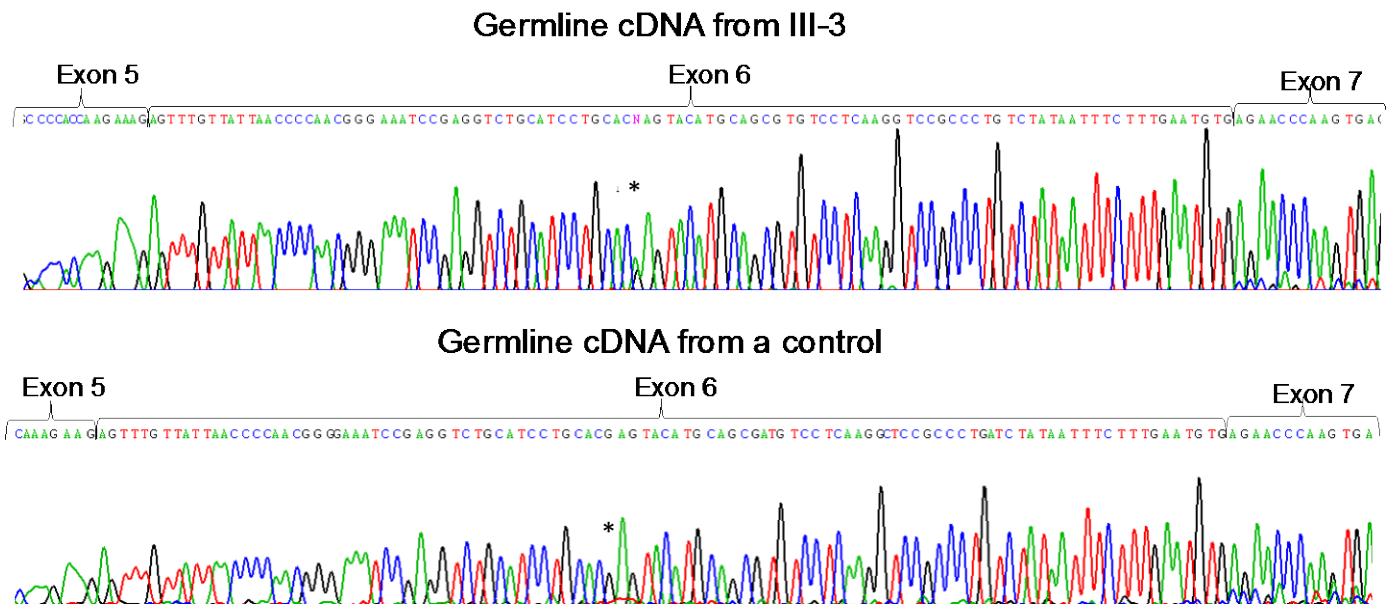

**Supplementary Figure 4.** The presence of the wild type base G and the mutated base A at the position of the asterisk demonstrates that the variant c.1552G>A;p.E518K is expressed together with the wild type allele.

**Supplementary Figure 5. Genome-wide Allelic Imbalance (LOH) analyses in Schwannomas, Choroid Plexus Papilloma, Papillary Thyroid Cancer and Wilms Tumors bearing *DGCR8*-c.1552G>A;p.E518K**

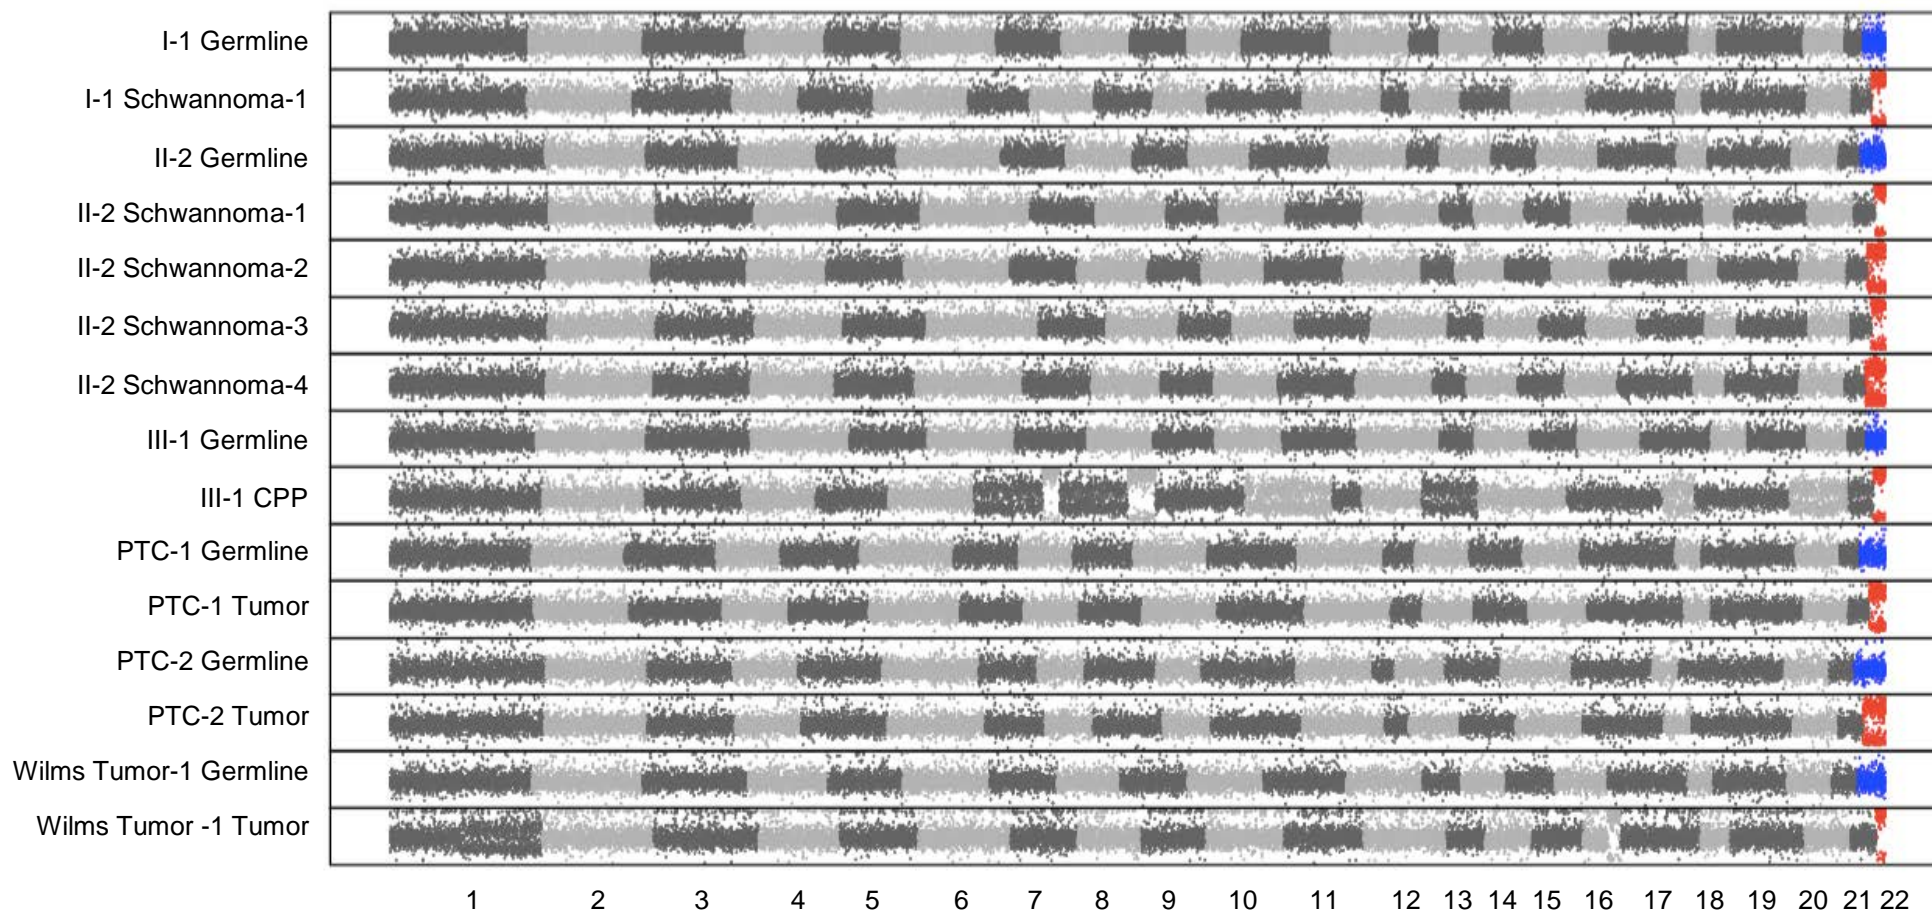

**Supplementary Figure 5.** Germline and tumor genome-wide allelic imbalance (LOH) analysis in a set of 8 *DGCR8*-E518K mutated tumors and their corresponding paired germline samples. Genome-wide recurrent plot of Allelic Imbalance (AI) are generated by ExomeAI(34) from samples subjected to WES in the present study (tumors from the family index) or from publicly available data (WES from Follicular variant PTC-1 and 2 and WGS from Wilms Tumor-1). WES confirmed a loss of the entire Chr22 in all tumors analyzed. The x-axis lists chromosomes according to their number. Each row is one sample. *DGCR8* is located on chromosome 22. Blue color on Chr22 means no aberration (germline samples); red color, LOH (tumor samples).

**Supplementary Figure 6. Genome-wide copy number analysis using SNP-arrays (OncoScans) in MNGs of individuals II-2, III-1, III-2, III-3 and in the two PTC samples with the c.1552G>A;p.E518K mutation in *DGCR8***

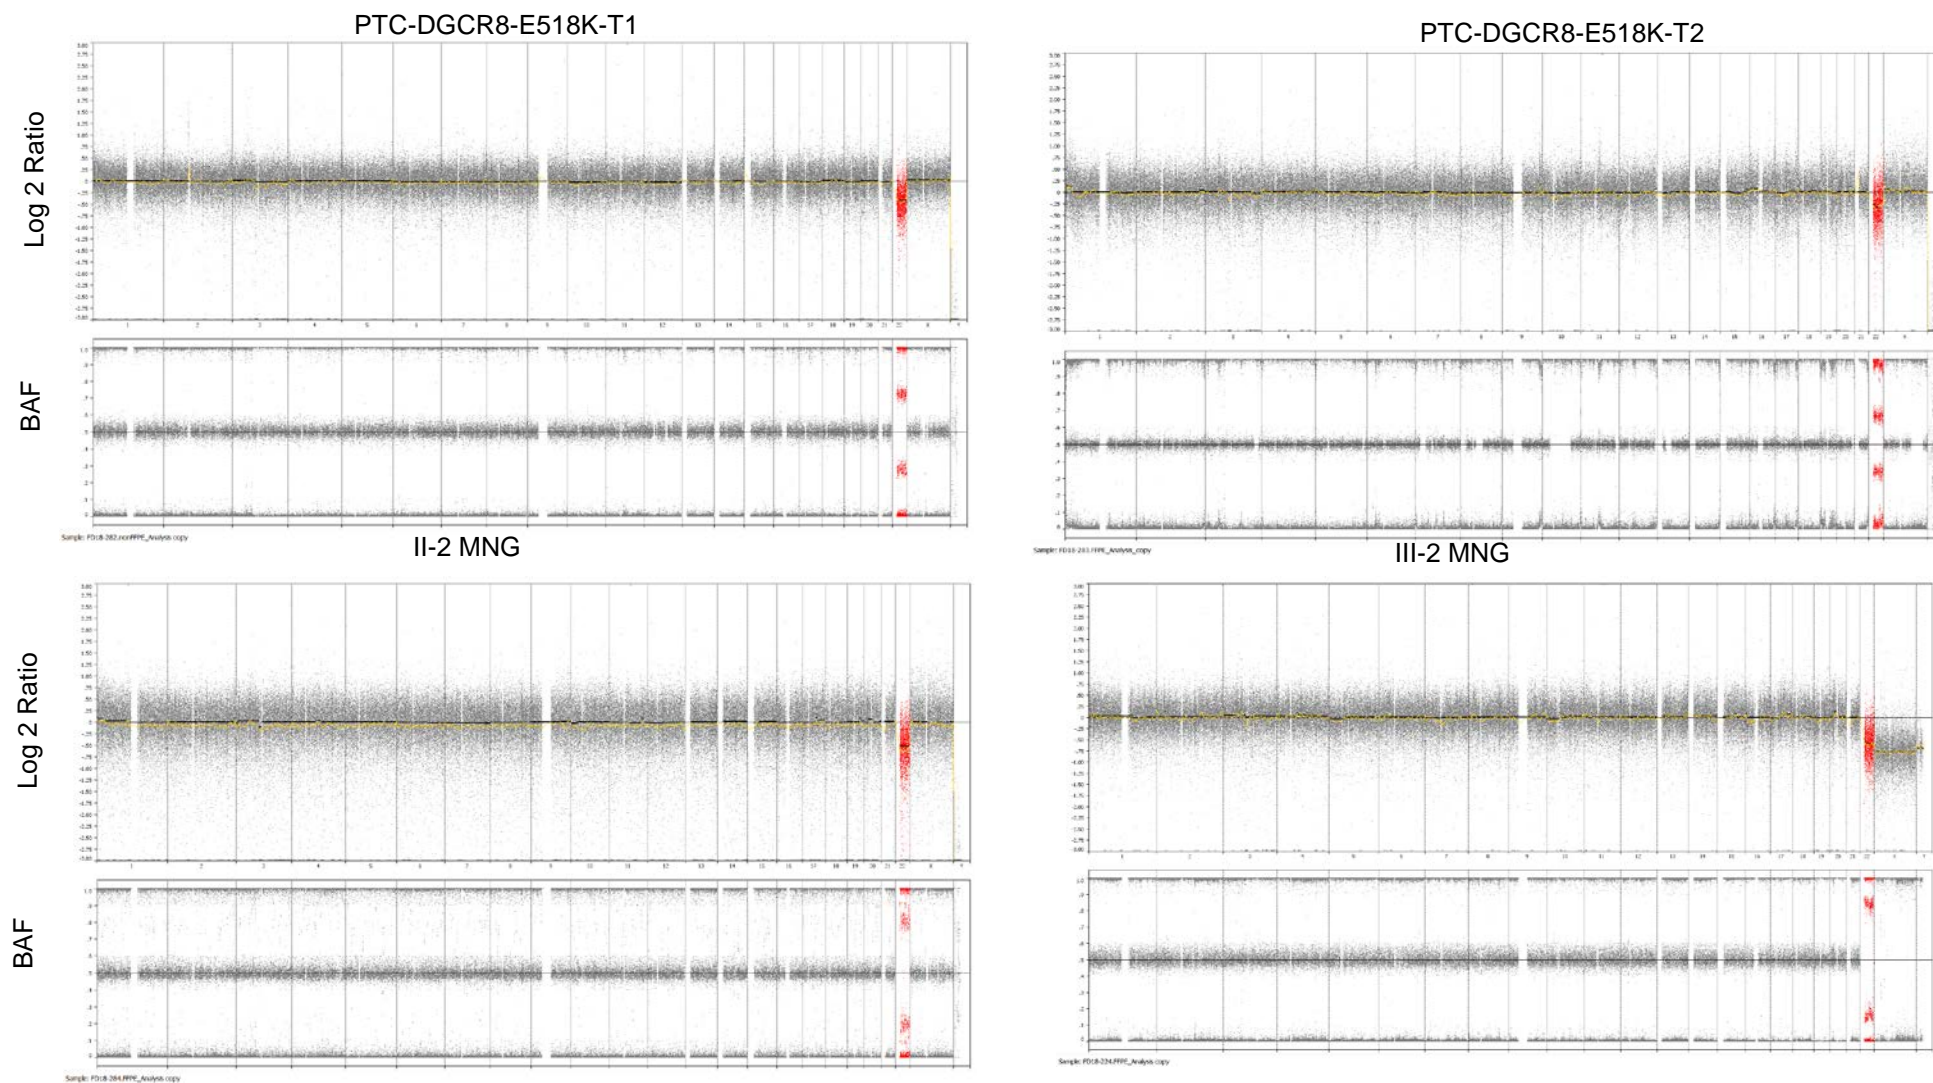

III-1 MNG

III-3 MNG

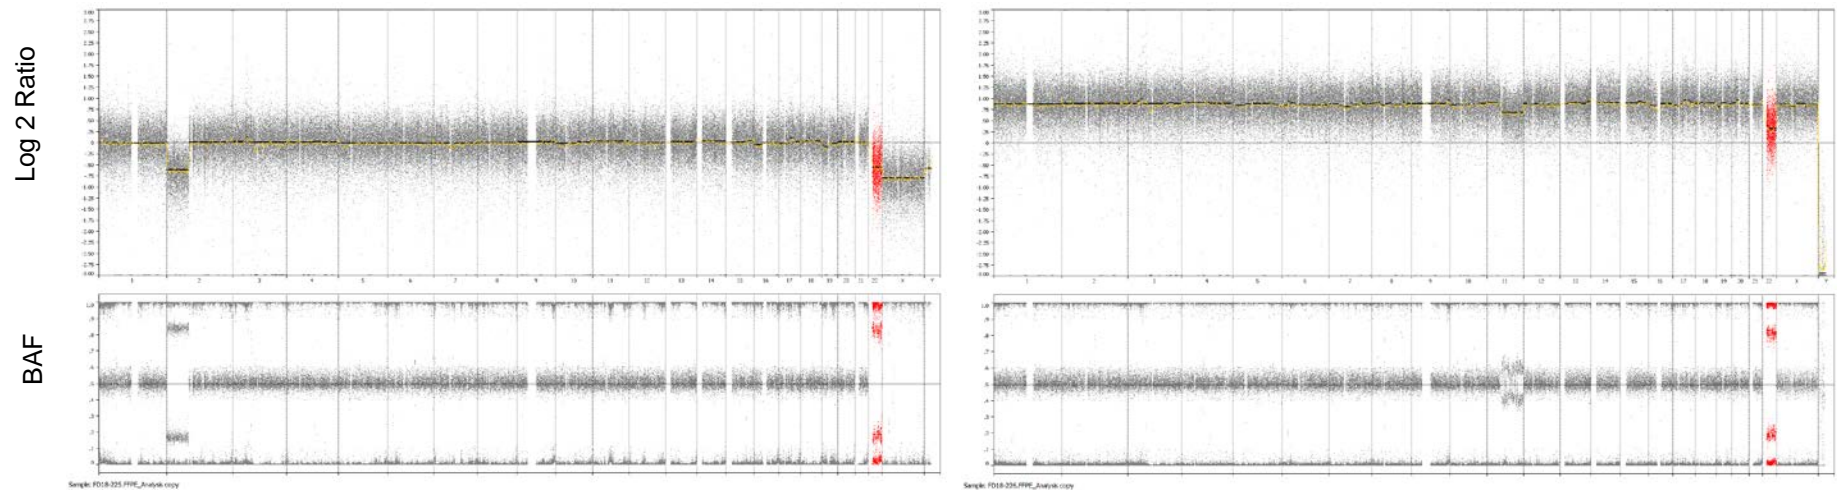

**Supplementary Figure 6.** Genome-wide plot of copy number alterations (CNA) in MNGs of individuals II-1, II-2, III-1, III-2, III-3 and in the two PTC (follicular variant) samples with the E518K mutation in *DGCR8*. In the genome wide plots of imbalances the X-axis represents the genome from chromosome 1p to Y. Imbalance (upper panels) and B-allele frequency (BAF, lower panels) plots. In the imbalance plots, the Y axis gives the log2 ratio correlating to the intensity ratio of each probe of the analyzed sample in comparison to a reference. Dots represent balanced areas in the tumor which are centered around 0. In the BAF plots, values of 0 and 1 indicate (germline) homozygosity and values of around 0.5 heterozygosity (i.e. an equal number of two different alleles). In all samples, the BAF of non-homozygous calls is skewed away considerably from the 0.5 value indicating allelic imbalance at Chr22 (highlighted in red). As can be seen from the BAF plots, the only alteration common in all MNG and PTC samples was the allelic imbalance at the Chr22 in line with all samples showing an homozygous genotype at the *DGCR8* locus. These can be due to different mechanisms like deletion of (a) Chr22 allele(s) from overall ploidy, or as in III-3 a complex gain leading to a 4n genome and a loss of the Chr22 allele from the mother (resulting in a copy-neutral LOH). These results are also in concordance with the genome alterations shown in the schwannomas and CPP from the family members and *DGCR8*-E518K Wilms Tumor, LOH being the common event among all samples. The PTC samples were also analyzed by WES and showed allelic imbalance in Chr22 confirming a loss of Chr22. The loss of Chr22 resulting in LOH in the MNGs was also confirm by the presence of allelic imbalances in the Haloplex<sup>HS</sup> data and Sanger sequencing both showing an overall absence of the wild type allele.

**Supplementary Figure 7. Functional in silico characterization of the c.1552G>A, p.E518K variant in *DGCR8***

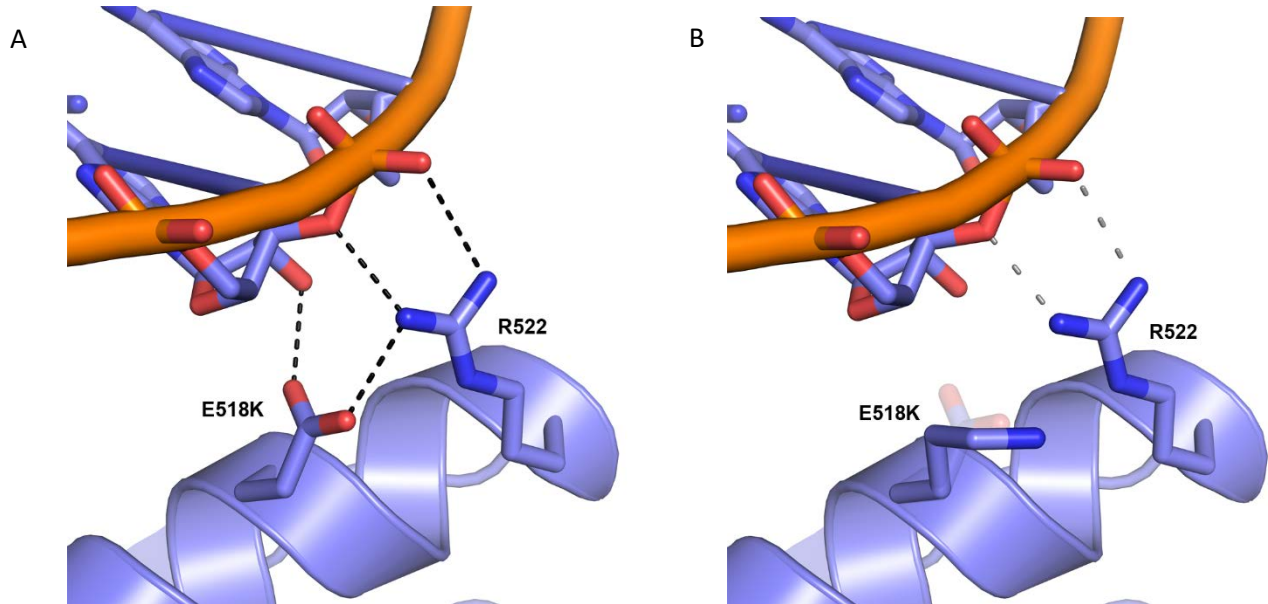

**Supplementary Figure 7. A)** Cartoon diagram of the structure of wild type DGCR8 bound to double stranded RNA showing the environment around residue 518. Residue E518 is located in the double stranded ribosome binding domain and makes a hydrogen bond interaction with the ribose of a RNA nucleotide. E518 is also forming a hydrogen bond with R522, a residue involved in interactions with the phosphate backbone of RNA. **B)** Cartoon diagram illustrating the impact of the E518K mutation. For reference the wild type E518 is also depicted in semi-transparent stick representation. The mutation of E518 to lysine, results in the abolishment of a hydrogen bond between DGCR8 and the RNA. Additionally, the two hydrogen bonds between R522 and the RNA phosphate backbone would likely be weakened, as the arginine is no longer anchored by residue 518. Finally, the E518K mutant would create an unfavorable charge environment, with two positively charged residues, lysine and arginine, now in close proximity. For these reasons, it is expected that this mutation will reduce the affinity of DGCR8 for double stranded RNA.

## Supplementary Figure 8. Consensus clustering of miRNA expression analysis in the Schwannoma and Wilms Tumor datasets

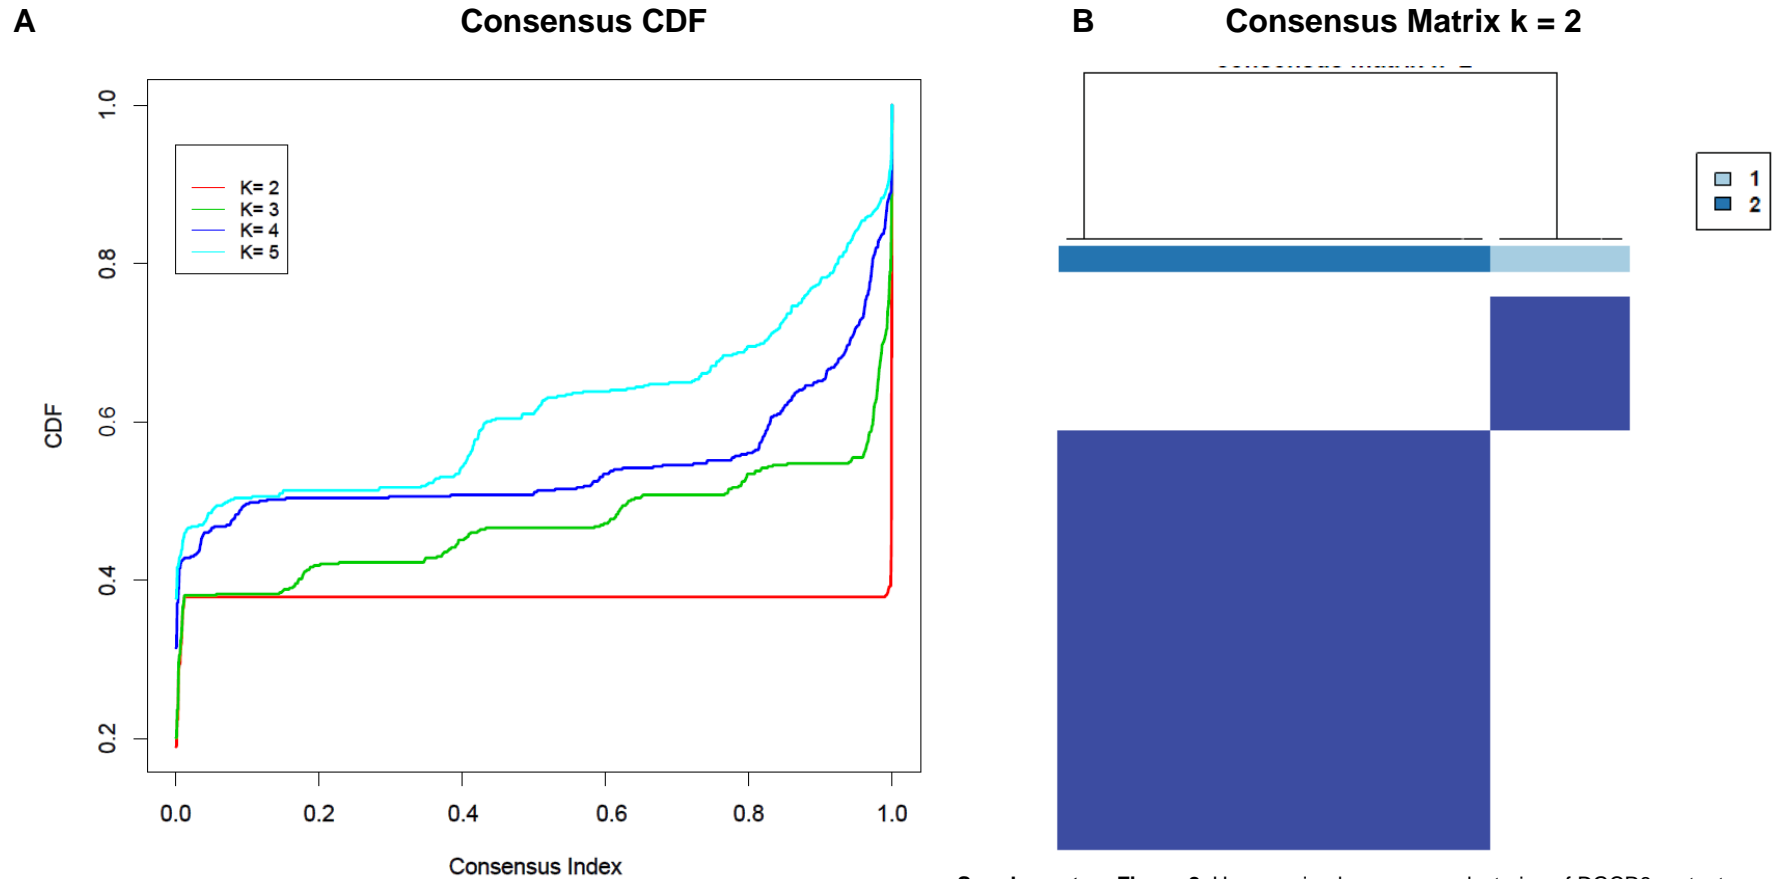

**Supplementary Figure 8.** Unsupervised consensus clustering of DGCR8-mutant samples and their wild type counterparts (n sample = 33) using normalized miRNA expression values. The clustering was evaluated for 2 up to 5 clusters (k = 2 to 5), with 1000 repetitions with subsampling 80% of all miRNAs at each repetition.

**A)** Consensus distributions for each k using empirical Cumulative Distribution Function (CDF) plot for each K from 2 to 5. As the CDF plot clearly shows, the 2-cluster solution performs best with lowest Proportion of Ambiguous Clustering. **B)** Consensus membership matrix for 2-cluster solution (k = 2).

**Supplementary Figure 9. Multidimensional scaling visualization of miRNA expression in *DGCR8*-c.1552G>A;p.E518K mutated tumors and their wild type counterparts**

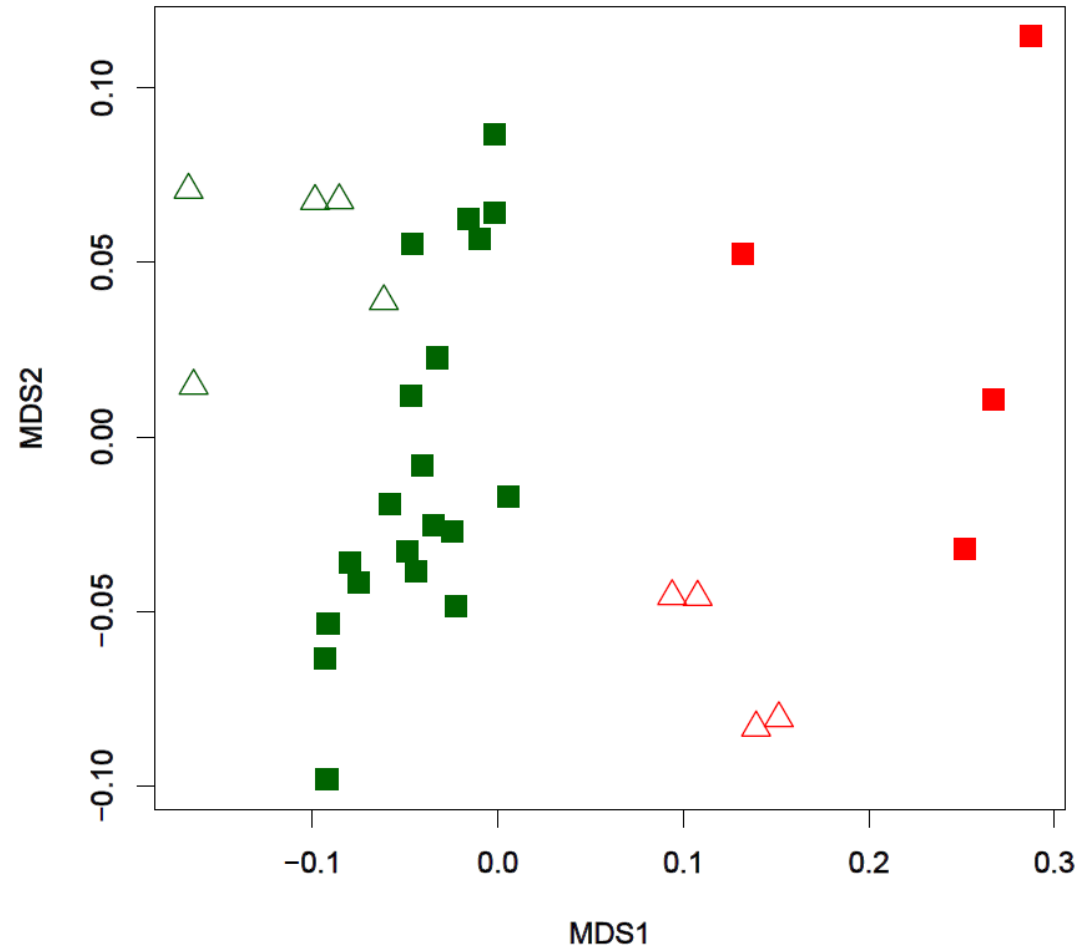

**Supplementary Figure 9.** Multi-Dimensional Scaling (MDS) plot of miRNA expression (the same data as Figure 3A). The primary MDS axis (MDS1) can separate DGCR8-mutant Wilms tumors and DGCR8-mutant Schwannomas (MDS1 < 0.01) from their wild type counterparts (MDS1 > 0.09). Rectangles: Wilms tumors; Triangles: Schwannomas; Red: DGCR8-mutant; Green: DGCR8-wild type

**Supplementary Figure 10. Comparison among the differential expression analysis in the Schwannoma and Wilms Tumor datasets**

**A**

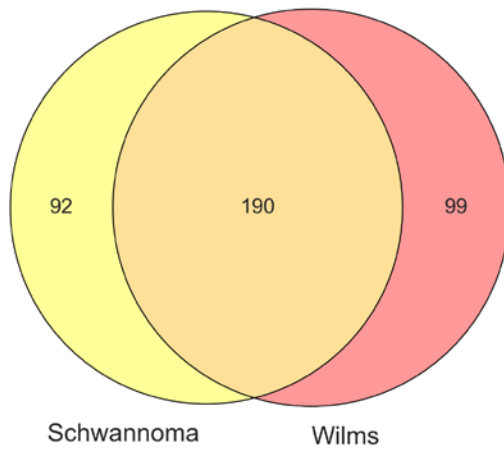

**B**

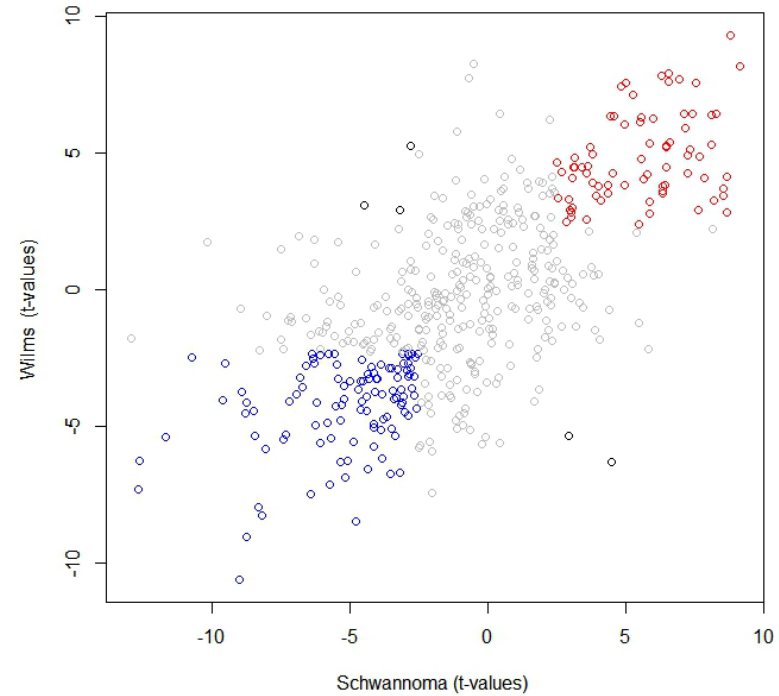

**Supplementary Figure 10.** miRNA differential expression analysis (DGCR8 mutated vs DGCR8 wild type tumors) was performed separately for each dataset. **A)** The Venn diagram shows that about two-thirds ( $n = 190$ ) of the differentially expressed miRNA ( $FDR < 0.01$ ) in each dataset are shared among the two. **B)** The scatter plot shows that the differentially expressed miRNA are regulated in the same direction for both datasets (red: overexpressed in DGCR8-mutated tumors, blue: under expressed).

**Supplementary Figure 11. Pre-miRNA clustering of *DGCR8*-c.1552G>A;p.E518K mutated tumors and their wild type counterparts**

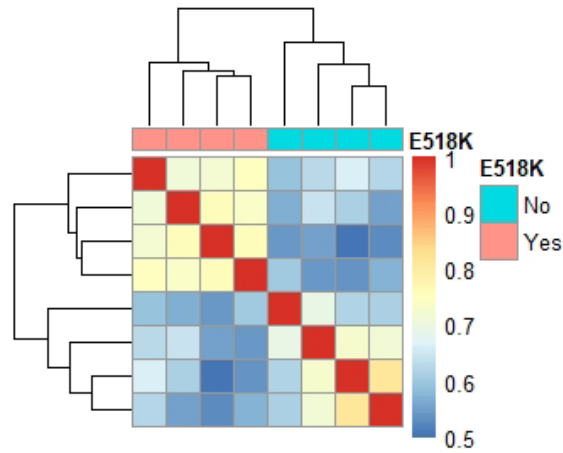

**Supplementary Figure 11.** Unsupervised hierarchical pre-miRNA expression clustering of 4 *DGCR8*-E518K mutated schwannomas from II-2, and 4 *DGCR8* wild type schwannomas from controls. *DGCR8*-E518K mutated and *DGCR8* wild type samples separate from each other based on their pre-miRNA profiles as expected. The total number of pre-miRNA identified was  $n = 251$ , all 251 were used in the clustering.

**Supplementary Figure 12. Pre-miRNA Differential Expressed (DE) analysis of tumors with or without *DGCR8* mutation**

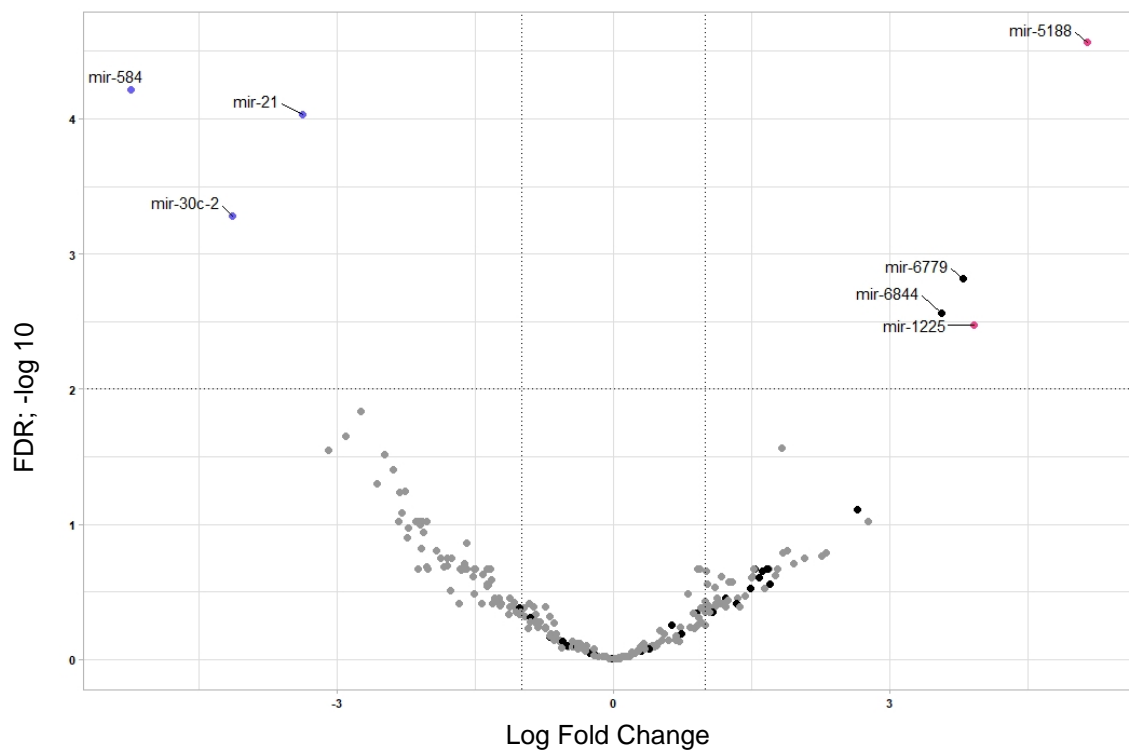

**Supplementary Figure 12.** The volcano plot shows the results of DE pre-miRNA expression analysis between schwannoma cases with (n = 4) and without *DGCR8* mutation (n = 4). Upregulated and downregulated pre-miRNAs in *DGCR8* mutated cases are shown in red and blue, respectively. Black dots represent the non-canonical intronic miRNAs, mirtrons. Log Fold Change is plotted on the x-axis and adjusted p-value (FDR; -log10 scale) on the y-axis. Horizontal and vertical lines indicate threshold of significance (FDR <0.01; absolute fold change >2). One of the most significantly under expressed pre-miRNAs, miR-30-c-2, is the precursor for the most significant underexpressed mature miRNA. Overrepresentation of mirtrons was validated using mature miRNAs in 2 different datasets (Figure 4B, Figure 4D).

### Supplementary Figure 13. In vitro cleavage with pri-miR-223

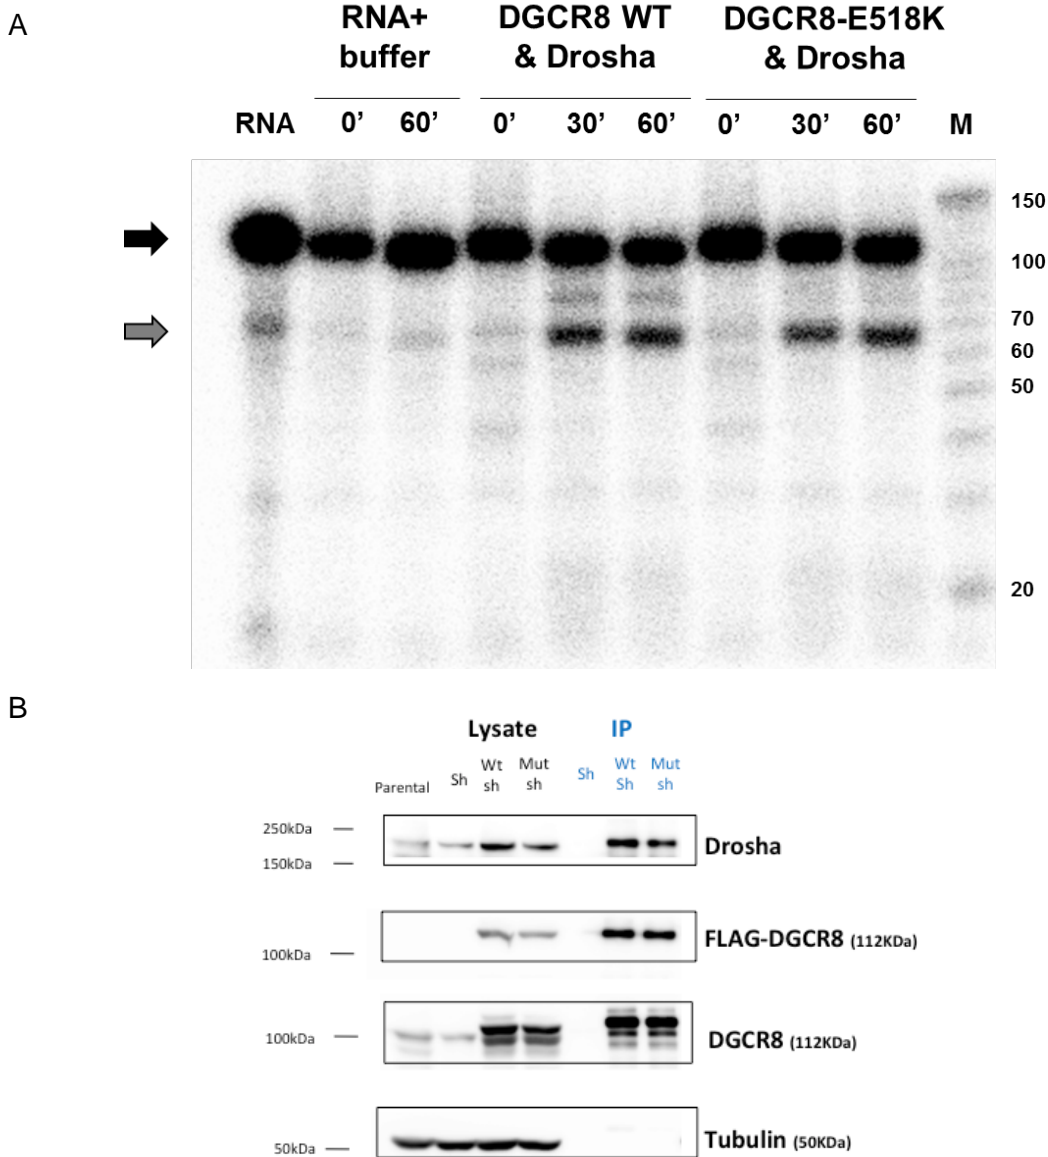

**Supplementary Figure 13. A)** In vitro cleavage assay for DGCR8-Drosha wild type (WT) and DGCR8-E518K-Drosha (Mutant) using the pri-miR-223 hairpin. Given that miR-223 was not differentially expressed among DGCR8 mutated tumors vs DGCR8 wild type counterparts, pri-miR-223 was selected as a positive control for the cleavage experiment. The expected pattern of cleavage is shown in DGCR8 WT-Drosha, with cleavage of the pri-miR-223 hairpin occurring over 60 minutes, leading to a diminution of the intensity of the pri-miR-223 band at 100 nucleotides and production of pre-miR-223 over the same time. The image is representative of three independent replicate experiments. In each experiment, three conditions were tested, and freshly immunoprecipitated

proteins were used in each case. DGCR8-E518K-Drosha (Mutant) showed production of pre-miR-223 over the same time, almost with the same intensity as with DGCR8-Drosha wild type. A radiolabeled RNA molecular weight marker was loaded in every assay, shown as "M". "RNA" means only the pri-miR-223 was added. The experiment was done in triplicate. **B)** Blots showing DGCR8 expression in the lysates and immunoprecipitated FLAG-DGCR8. Tubulin was included as loading control. Immunoprecipitated proteins were used for the in vitro cleavage assays with primaries miR-30c-2 and miR-223. Primary miR-223 was used as a control.

### Supplementary Figure 14. miRNA Differential Expressed (DE) analysis of tumors with or without *DICER1* mutation

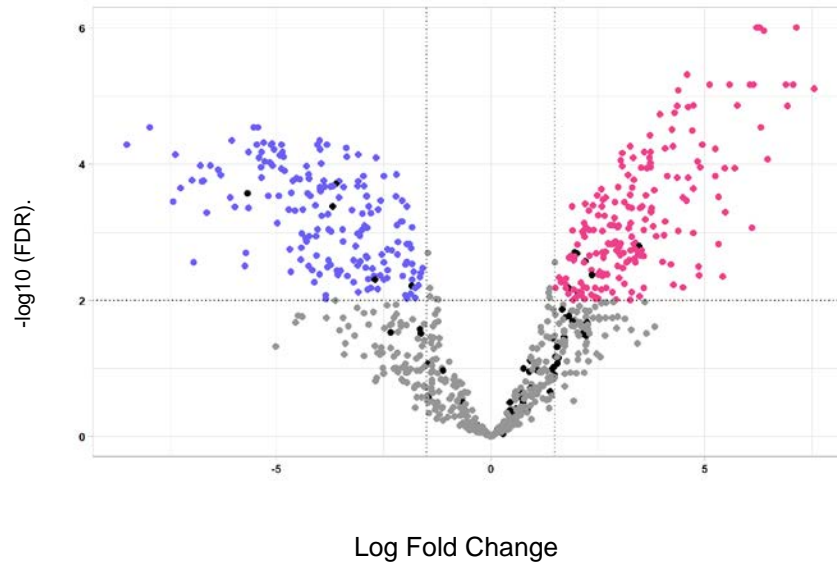

**Supplementary Figure 14.** The volcano plot shows the results of DE miRNA expression analysis between pituitary blastoma cases with *DICER1* mutations ( $n = 3$ ) versus normal pituitary *DICER1* wild type ( $n = 7$ ; 4 adult and 3 fetal samples). Overexpressed and under expressed miRNAs in *DICER1* mutated cases are shown in red and blue, respectively. Black dots represent the non-canonical intronic miRNAs, mirtrons that appear in both in contrast to DGCR8 mutated schwannomas and Wilms Tumors. Log Fold Change is plotted on the x-axis and adjusted p-value (FDR;  $-\log_{10}$  scale) on the y-axis. Horizontal and vertical lines indicate threshold of significance (FDR < 0.01) absolute fold change (>2). Axes: X: Log Fold Change; Y:  $-\log_{10}$  (FDR).

Supplementary Figure 15. Gene Set Enrichment Analysis of DGCR8 mutated vs. wild type Schwannomas

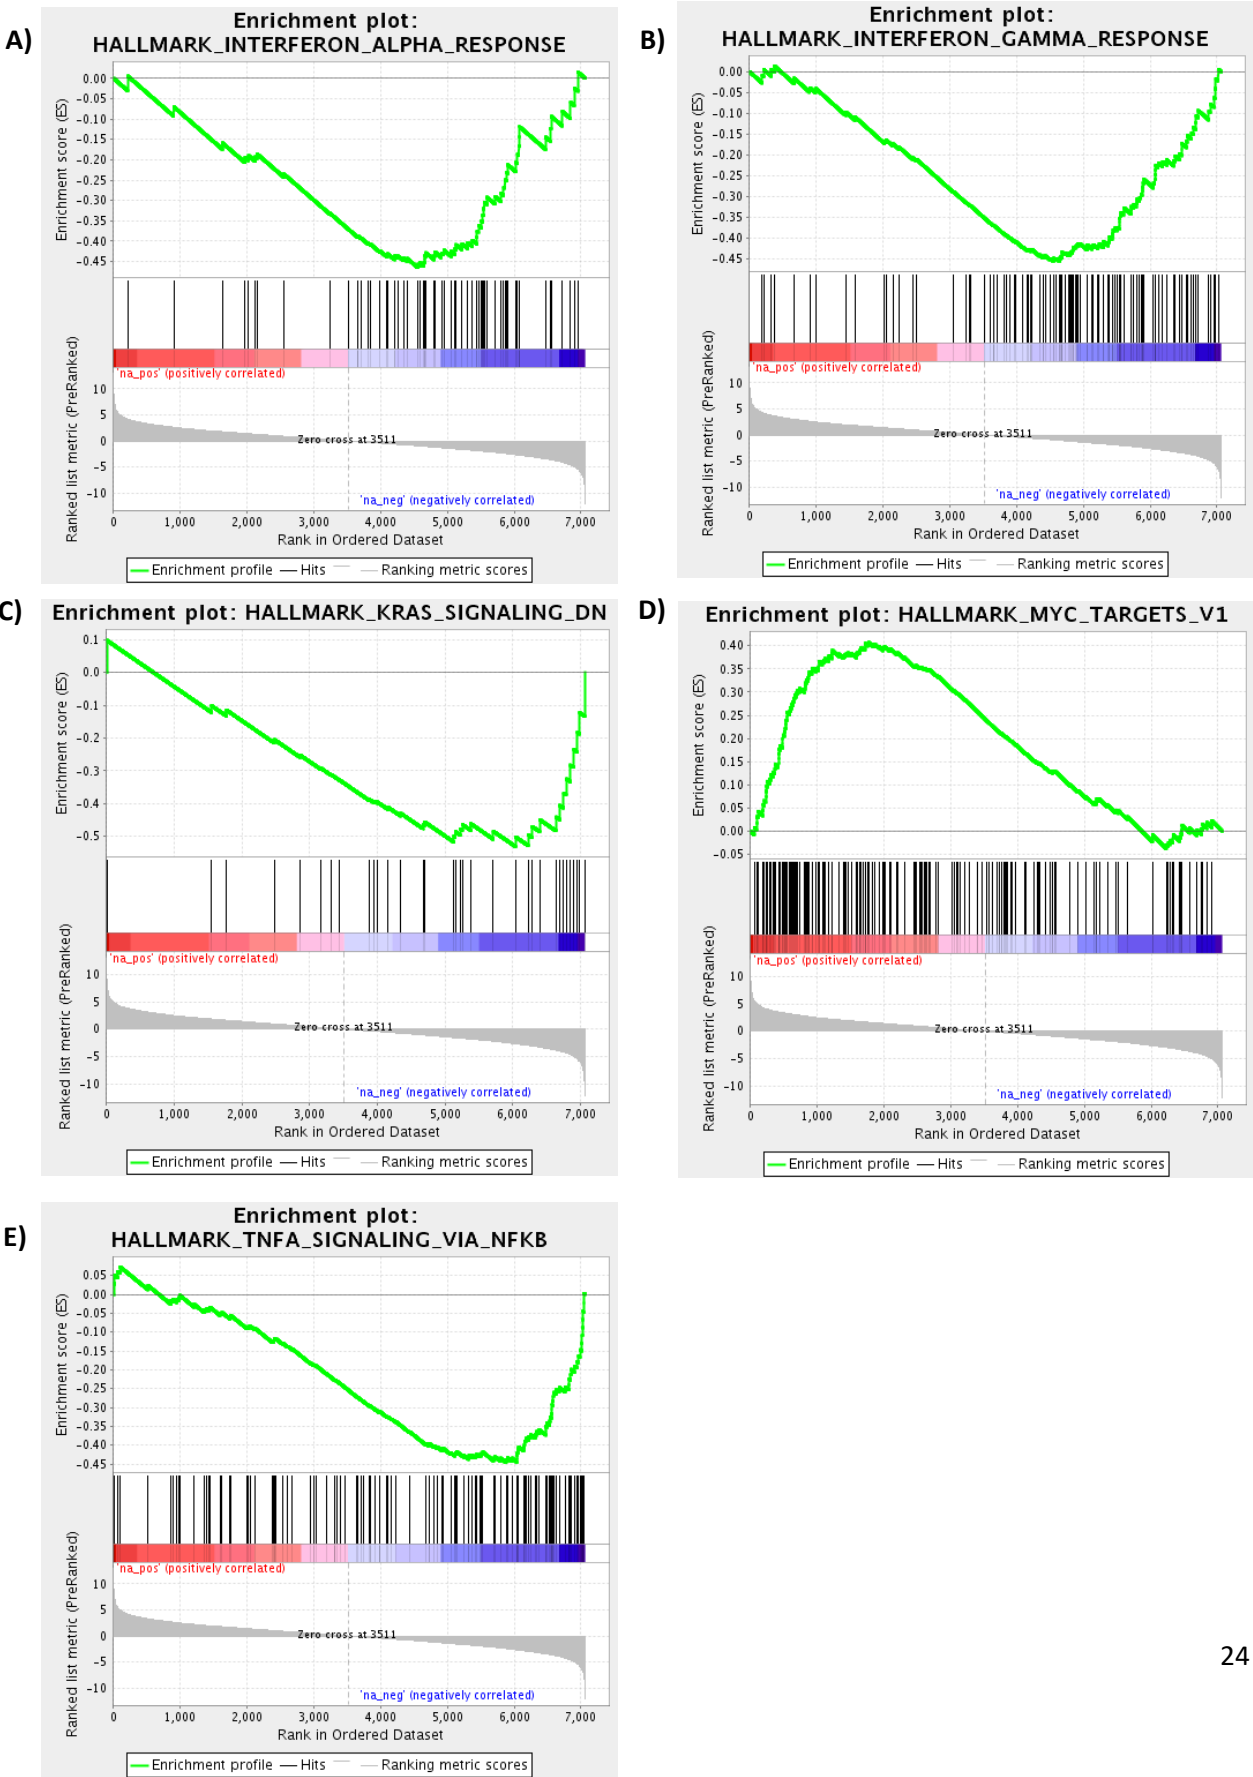

**Supplementary Figure 15.** Gene Set Enrichment Analysis(24), based on comparison between DGCR8-mutated and wild type schwannomas, using 50 Hallmark Gene Sets(25). Enrichment plots for the 5 significantly enriched gene sets (out of 50) with FDR less than 0.01 (NES > 1.9 or NES < -1.9) are shown (See also Supplementenetary Table 13). **A)** HALLMARK\_INTERFERON\_ALPHA\_RESPONSE; **B)** HALLMARK\_INTERFERON\_GAMMA\_RESPONSE; **C)** HALLMARK\_KRAS\_SIGNALING\_DN (Genes down-regulated by KRAS activation(7)); **D)** HALLMARK\_MYC\_TARGETS\_V1; **E)** HALLMARK\_TNFA\_SIGNALING\_VIA\_NFKB

**Supplementary Figure 16. Chromosomal location of *DGCR8*, *LZTR1*, *SMARCB1* and *NF2* along Chr22**

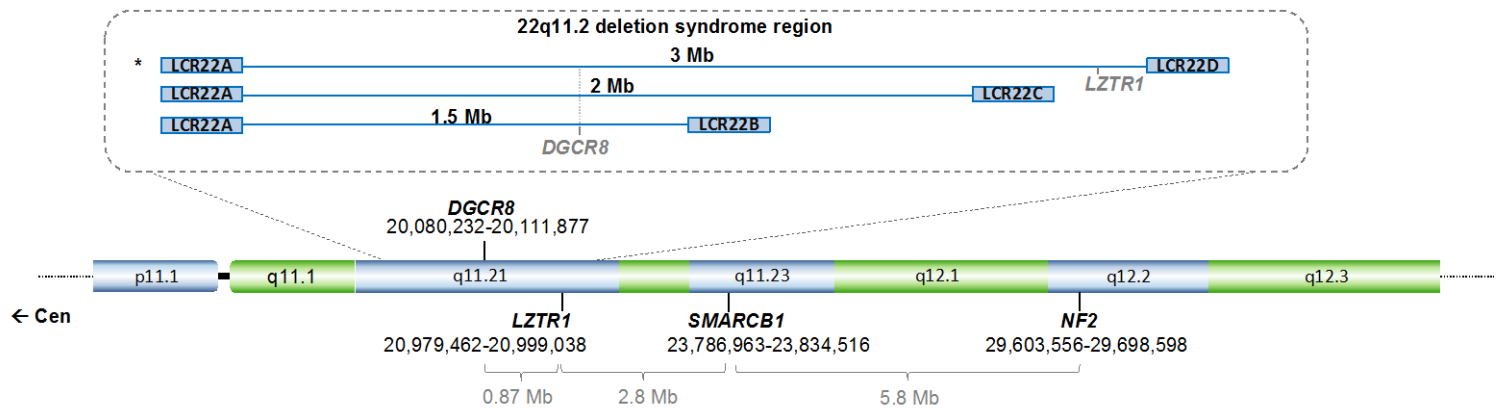

**Supplementary Figure 16.** Chromosomal locations and distances among genes [shown in megabases (Mb) with horizontal brackets] are based on (GRCh37/hg19) assembly. Data was obtained from Ensembl genome browser (<https://grch37.ensembl.org/index.html>).

Supplementary Figure 17. Genotype-phenotype association of previously described mutations in the literature and public databases

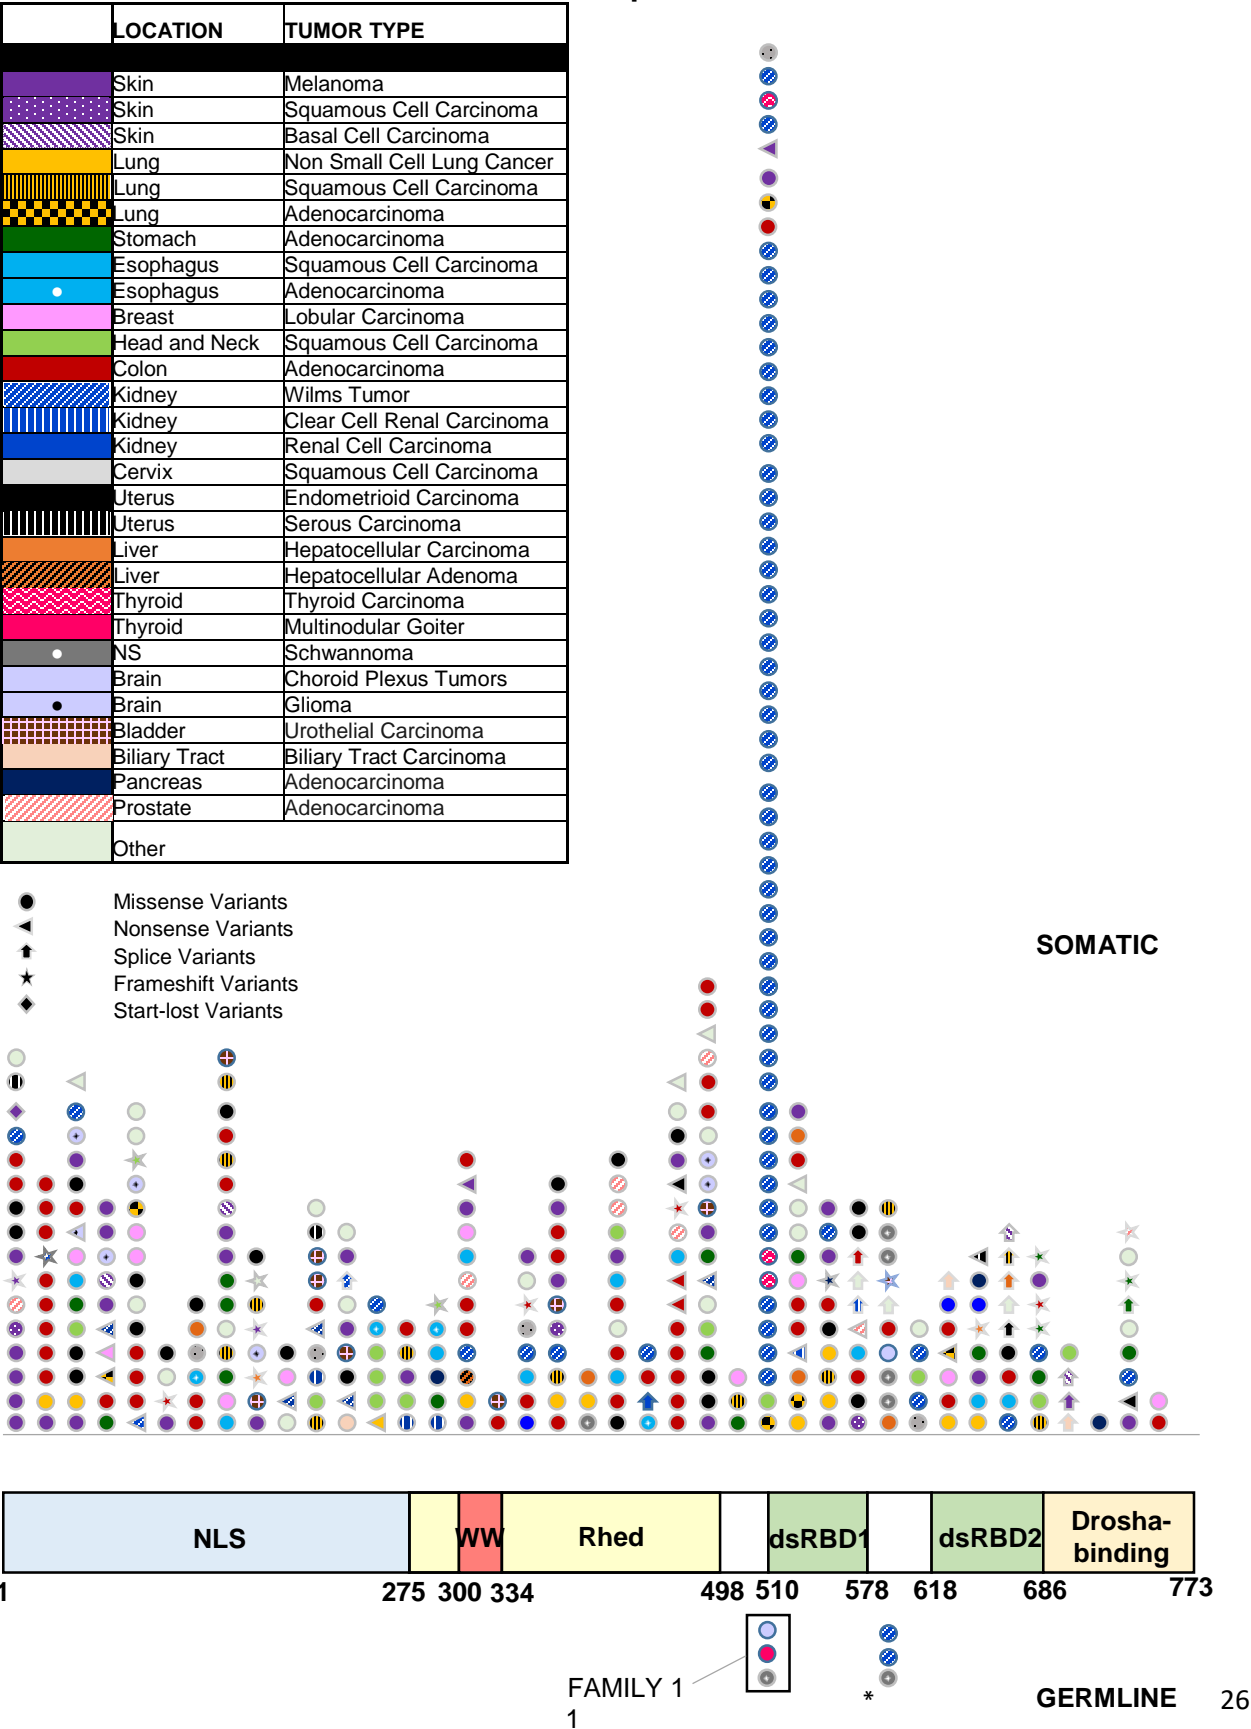

**Supplementary Figure 17.** Germline mutations are shown at the bottom of the protein sequence, somatic mutations at the top. If no germline DNA was available, variants identified in tumors were plotted as somatic by default. The shapes refer to the type of mutation while color code refers to associated pathology as noted in the color key. *Note*, Wilms Tumors cluster exclusively within the p.E518K hotspot.

Asterix: The germline variant K588R has been listed in the literature. The general allele frequency is 0.6% in ExAC(26), which is greater than the pathogenic allele-frequency threshold  $\leq 0.1\%$ . Apart from the two Wilms tumors taken from the literature containing variant p.K588R, we also identified p.K588R in 7 out of 181 tumors sequenced. Two out of the 7 are from the same patient (2 schwannomas) and was plotted once as germline. The six remaining samples were plotted as somatic (1 CPT and 5 schwannomas). However, our NanoString analysis confirmed a miRNA profile for the p.K588R similar to a wild type sample. Although we have kept it in the plot, all this data indicates that this variant is likely a benign polymorphism. Domains of DGCR8 are color coded. The double strand RNA binding domain 1 (dsRBD1) and double strand RNA binding domain 2 (dsRBD2) are both shown in green. Drosha binding domain as well as the RNA-binding heme domain (Rhed) are shown in yellow. Red shows the dimerization domain (WW) and in blue is the nuclear localization signal (NLS).

**Data was taken from ICGC datportal** (<https://dcc.icgc.org>; last accessed 03/2018), **TumorPortal** (<http://www.tumorportal.org>; last accessed 03/2018), **cBioportal** (<http://www.cbioportal.org>; last accessed on 25/06/2018), **Decipher**, **COSMIC** (<https://cancer.sanger.ac.uk/cosmic>; last accessed 5/07/2018).

We removed variants in the following categories:

(A) MUTATION TYPE: Intronic, UTRs, synonymous, upstream, downstream; (B) FREQUENCIES: gNOMAD  $\geq 0.001$ , 1KMAF  $\geq 0.001$ , EXAC  $\geq 0.001$ , rs  $\geq 0.001$ ; (C) PREDICTORS: 3 out of 4 were benign (PPH2, SIFT, CONDEL, MutTaster or MutAssessor) and CADD  $\leq 20$ ; (D) Duplicates and Triplicates of samples.

## Supplementary Tables

**Supplementary Table 1.** Germline variants of index family (WES) (family segregation)

| Gene             |       | <i>COL6A2</i>                      | <i>DGCR8</i>                     |
|------------------|-------|------------------------------------|----------------------------------|
| Gene info        |       | NM_001849:<br>ex10:c.G988A;p.D330N | NM_022720:<br>ex6:c.G1552A;E518K |
| Individual       | II-1  | (het) – VAF=0.492                  | (het) - VAF=0.409                |
|                  | I-1   | (het) - VAF=0.425                  | (het) - VAF=0.511                |
|                  | II-2  | (het) - VAF=0.605                  | (het) - VAF=0.468                |
|                  | III-1 | (het) - VAF=0.544                  | (het) - VAF=0.523                |
|                  | III-2 | (het) - VAF=0.513                  | (het) - VAF=0.349                |
|                  | III-3 | (het) - VAF=0.452                  | (het) - VAF=0.478                |
|                  | II-4  | -                                  | -                                |
|                  | II-3  | -                                  | -                                |
|                  | III-5 | -                                  | -                                |
| rsID138          |       | rs139399166                        | -                                |
| 1000G_MAF*       |       | 0.00019968                         | 0                                |
| EVS_MAF*         |       | 0.000384                           | 0                                |
| ExacNoTCGA_MAF*  |       | 3.00E-04                           | -                                |
| gnomad_MAF*      |       | 0.0002                             | -                                |
| Homozygotes_EXAC |       | 0.000304                           | -                                |
| COSMIC_ID        |       | COSM1201959                        | COSM3371859                      |
| SIFT**           |       | 0.11, 0.89, T                      | 0, 1.00, D                       |
| Polyphen2**      |       | 0.997,D                            | 0.999,D                          |
| MutationTaster** |       | 1,1.0,D                            | 1,1.0,D                          |
| Revel**          |       | 0.456                              | 0.819                            |
| MCAP**           |       | 0.2347232                          | 0.27728257                       |
| CADD_phred**     |       | 33                                 | 35                               |

\* Minor allele frequency (MAF) in the 1000 Genome project (<http://www.1000genomes.org/home>), EVS (Exome Variant Server; <http://evs.gs.washington.edu/EVS/>), Non-TCGA ExAC (The Exome Aggregation Consortium; <http://exac.broadinstitute.org/>), gnomAD (<http://gnomad.broadinstitute.org/>), KAVIAR (<http://db.systemsbiology.net/kaviar/>) and Greater Middle East (<http://igm.ucsd.edu/gme/>) databases. VAF= Variant allele frequency

\*\* Functional impact prediction results of 6 bioinformatics algorithms. The Revel score changes between 0 to 1 and more damaging variants have higher scores. CADD score  $\geq 20$  indicates deleterious variants.

**Supplementary Table 2.** Coverage data for the WES experiment in the germline of 9 members of the family

| Sample_id | Mean | %CCDS bases<br>≥ 5x coverage | %CCDS bases<br>≥ 10x coverage | %CCDS bases<br>≥ 20x coverage | %CCDS bases<br>≥ 50x coverage |
|-----------|------|------------------------------|-------------------------------|-------------------------------|-------------------------------|
| II-1      | 134  | 98.5                         | 98.1                          | 97.4                          | 92.5                          |
| I-1       | 92   | 98.1                         | 97.2                          | 94.7                          | 79.2                          |
| II-2      | 167  | 98.3                         | 98.0                          | 97.4                          | 93.4                          |
| III-3     | 238  | 98.4                         | 98.0                          | 97.2                          | 94.0                          |
| II-4      | 90   | 98.3                         | 97.8                          | 95.9                          | 73.1                          |
| III-4     | 122  | 98.3                         | 97.8                          | 96.6                          | 87.5                          |
| III-2     | 137  | 98.6                         | 98.3                          | 97.4                          | 90.7                          |
| III-1     | 131  | 98.6                         | 98.2                          | 97.2                          | 89.7                          |
| II-3      | 136  | 98.6                         | 98.2                          | 97.6                          | 91.3                          |

**Supplementary Table 3.** Loss of heterozygosity (LOH) summary in tumors of the index family

| PEDIGREE                  | I-1            | II-1 |    |     | II-2           |                |                |                |                | III-1          |                |     |     | III-2 |                |     |     | III-3      |     |     |      |     |
|---------------------------|----------------|------|----|-----|----------------|----------------|----------------|----------------|----------------|----------------|----------------|-----|-----|-------|----------------|-----|-----|------------|-----|-----|------|-----|
| Lesion                    | Schw           | MNG  |    |     | Schw           |                |                |                | MNG            | CPP            | MNG            |     |     | Schw  | MNG            |     |     | MNG        |     |     | Schw |     |
|                           | 1              | 1    | 2  | 3   | 1              | 2              | 3              | 4              | 1              | 1              | 1              | 2   | 3   | 1     | 1              | 2   | 3   | 1          | 2   | 3   | 1    | 2   |
| E518K-LOH                 | +              | +    | -  | +   | +              | +              | +              | +              | +              | +              | +              | +   | +   | +     | +              | +   | +   | +          | +   | +   | +    | +   |
| DGCR8- LOH/<br>Chr22 loss | Chr22-<br>Loss | NA   | NA | LOH | Chr22-<br>Loss | LOH | LOH | LOH   | Chr22-<br>Loss | LOH | LOH | CN-<br>LOH | LOH | LOH | LOH  | LOH |

The MNGs tissue from II-1, III-1, III-2 and III-3 were studied by a Haloplex<sup>HS</sup>. DNA was extracted from 3 different nodules. For each individual, the presence of LOH at the variant c.1552G>A;p.E518K locus in every nodule was validated by Sanger sequencing. + corresponds to presence of LOH at the E518K locus. All samples tested showed LOH at the E518K locus except for 1 nodule out of three in individual II-1. No variant in other miRNA processing genes (*DICER1*, *DROSHA*, *DIS3L2*, *XPO5*, *AGO2* and *TARPB2*) was found. Loss of heterozygosity extended to the entire *DGCR8* locus was confirmed by HHS results (as explained in the methods section; Threshold = 0.25. Cutoff = 66%). For nodule #1 in individual II-1, we could not calculate the length of LOH because of low coverage. NA: Not done. In parallel, the genome wide copy number status of MNG nodules #1 of II-2, III-1, III-2 and III-3 were studied by OncoScans. A loss of Chr22 was confirmed in II-2, III-1 and III-3 demonstrating that the LOH seen in the Haloplex and Sanger sequencing results from the loss of the wild type copy of Chr22, indicated in the table as Chr22-loss. The nodule #1 of III-1 showed a tetraploid genome except for Chr22 (2n) and presence of LOH demonstrating a copy neutral LOH (indicated as CN-LOH). An allelic imbalance showing LOH and loss of Chr22 was also seen in all schwannomas tested by WES (from individuals I-1 and II-2) and the CPP from III-1. The schwannomas from individuals III-2 and III-3 were tested by Sanger sequencing which confirmed LOH at the E518K locus. The whole *NF2* gene was tested in the schwannomas from III-2 and III-3 by Sanger sequencing. The schwannoma from III-2 had a truncating variant in *NF2*, c.112G>T;p.E38\* and the two schwannomas from individual III-3 each had one truncating variant in *NF2*, c.592C>T;p.R198\* and c.199\_226delACAATCAAGGACACAGTGGCCTGGCTCA;p.T67Kfs\*47, respectively.

**Supplementary Table 4.** Somatic mutations found by WES in 5 schwannomas from index family individuals (4 schwannomas from individual II-2, 1 schwannoma from individual I-1)

| Gene            | Gene Info                                                                                  | II-2<br>schw1<br>(VAF) | II-2<br>schw2<br>(VAF) | II-2<br>schw3<br>(VAF) | II-2<br>schw4<br>(VAF) | I-1<br>Schw<br>(VAF) | rsID138         | ExacNo<br>TCGA_<br>MAF* | gnomad<br>MAF* | COSMIC<br>_ID | SIFT**              | Polyphen<br>2** | Mutation<br>Taster** | Revel<br>** | MCAP*<br>*      | CADD<br>_phred<br>** |
|-----------------|--------------------------------------------------------------------------------------------|------------------------|------------------------|------------------------|------------------------|----------------------|-----------------|-------------------------|----------------|---------------|---------------------|-----------------|----------------------|-------------|-----------------|----------------------|
| <i>METTL11B</i> | NM_001136107:<br>ex2:c.182T>A:<br>p.V61D                                                   | -                      | -                      | -                      | het<br>(0.375)         | .                    | .               | .                       | .              | .             | 0.07,<br>0.93,<br>T | 0.735,P         | 1.000,1.00<br>0,D    | 0.15        | 0.0110<br>99107 | 24.6                 |
| <i>ZFAND4</i>   | NM_001128324:<br>ex5:c.371A>C:<br>p.D124A                                                  | -                      | -                      | -                      | het<br>(0.228)         | .                    | .               | .                       | .              | .             | 0,<br>1.00,<br>D    | 0.738,P         | 1.000,1.00<br>0,D    | 0.273       | 0.0592<br>79456 | 26.6                 |
| <i>APLNR</i>    | NM_005161:<br>ex1:c.1043C>T:<br>p.S348L                                                    | het<br>(0.323)         | -                      | -                      | -                      | .                    | rs369393<br>051 | 3.77E-05                | 3.23E-05       | .             | 0.26,<br>0.74,<br>T | 0.773,P         | 1.000,1.00<br>0,D    | 0.183       | 0.0232<br>65523 | 31                   |
| <i>ANO2</i>     | NM_001278596:<br>ex22:c.2375C>T:<br>p.P792L<br>NM_001278597:<br>ex22:c.2363C>T:<br>p.P788L | -                      | het<br>(0.358)         | -                      | -                      | .                    | rs370114<br>605 | 1.90E-05                | .              | .             | 0.05,<br>0.95,<br>D | 1.0,D           | 1,1.0,D              | 0.629       | 0.1251<br>83679 | 27.4                 |
| <i>TDRD9</i>    | NM_153046:<br>ex1:c.181C>T:<br>p.Q61X                                                      | het<br>(0.391)         | -                      | -                      | -                      | .                    | .               | .                       | .              | .             | .                   | .               | .                    | .           | .               | 27.2                 |
| <i>NF2</i>      | NM_000268:<br>ex3:c.331C>T:<br>p.Q111X                                                     | -                      | het<br>(0.708)         | -                      | -                      | .                    | .               | .                       | .              | COSM22<br>268 | .                   | .               | 1,1.0,D              | .           | .               | 40                   |
| <i>PDE6A</i>    | NM_000440:<br>ex18:c.2161C>T:<br>p.L721F                                                   | -                      | -                      | het<br>(0.425)         | -                      | .                    | .               | .                       | .              | .             | 0,<br>1.00,<br>D    | 0.836,P         | 1.000,1.00<br>0,D    | 0.782       | 0.0720<br>14929 | 28.1                 |
| <i>DROSHA</i>   | NM_013235:<br>ex19:c.2570G>A:<br>p.C857Y                                                   | het<br>(0.315)         | -                      | -                      | -                      | .                    | .               | .                       | .              | .             | 0,<br>1.00,<br>D    | 0.706,P         | 1,1.0,D              | 0.351       | 0.0305<br>23992 | 32                   |
| <i>DST</i>      | NM_015548:<br>ex84:c.15485C>T:<br>p.A5162V                                                 | -                      | -                      | -                      | het<br>(0.332)         | .                    | .               | .                       | .              | .             | 0.02,<br>0.98,<br>D | 0.889,P         | .                    | 0.119       | 0.0045<br>07108 | 24.1                 |

\* Minor allele frequency (MAF) in Non-TCGA ExAC (The Exome Aggregation Consortium; <http://exac.broadinstitute.org/>), gnomAD (<http://gnomad.broadinstitute.org/>).

\*\* Functional impact prediction results of 6 bioinformatics algorithms. The Revel score changes between 0 to 1 and more damaging variants have higher scores. CADD score  $\geq 20$  indicates deleterious variants.

\*\*\* Positive staining means that there was no alteration to the *SMARCB1* gene. Negative staining means that there is an alteration to the *SMARCB1* gene affecting protein expression.

**Supplementary Table 5.** Somatic mutations found by WES in the choroid plexus papilloma from individual III-1

| Gene           | Gene Info                                                                            | III-1<br>CPP<br>(VAF) | rsID138         | ExacNoTC<br>GA_MAF* | gnomad<br>MAF* | COSMIC_<br>ID  | SIFT**          | Polyphen2** | Mutation<br>Taster** | Revel*<br>* | MCAP** | CADD_p<br>hred** |
|----------------|--------------------------------------------------------------------------------------|-----------------------|-----------------|---------------------|----------------|----------------|-----------------|-------------|----------------------|-------------|--------|------------------|
| <i>PRPF3</i>   | NM_004698:<br>ex7:c.856C>T<br>p.R286C                                                | het<br>(0.11)         | .               | .                   | .              | .              | 0,1.00,D        | 0.98,D      | 1,1.0,D              | 0.655       | 0.315  | 34               |
| <i>ERCC6</i>   | NM_000124:<br>ex18c.3662G>A:<br>p.R1221Q                                             | het<br>(0.13)         | rs20043110<br>0 | 1.88E-05            | 3.23E-05       | COSM918<br>653 | 0,1,0.90,<br>T  | 0.926,D     | 1,1.0,D              | 0.497       | 0.062  | 35               |
| <i>FAM111B</i> | NM_198947:<br>ex4:c.G689G>A:<br>p.R230H                                              | het<br>(0.11)         | .               | 2.83E-05            | 3.24E-05       | .              | 0,1.00,D        | 0.857,P     | 1,0.0,N              | 0.307       | 0.053  | 24.3             |
| <i>CTSW</i>    | NM_001335:<br>ex7:c.739G>A:<br>p.E247K                                               | het<br>(0.13)         | .               | .                   | .              | .              | 0,1.00,D        | 0.9,P       | 1.000,0.000,<br>N    | 0.689       | 0.090  | 24.6             |
| <i>LRFN5</i>   | NM_152447:<br>ex4:c.1877C>T:<br>p.T626I                                              | het<br>(0.29)         | .               | .                   | .              | COSM401<br>477 | 0,25,0.75<br>,T | 0.247,B     | 1,1.0,D              | 0.197       | 0.015  | 24.9             |
| <i>PROX2</i>   | NM_001080408:<br>ex3:c.962C>T:<br>p.T321M                                            | het<br>(0.12)         | .               | .                   | .              | .              | 0,1.00,D        | 1.0,D       | 1,1.0,D              | 0.658       | 0.117  | 33               |
| <i>TMOD2</i>   | NM_001142885:<br>ex5:c.421C>T:<br>p.H141Y,<br>NM_014548:<br>ex5:c.421C>T:<br>p.H141Y | het<br>(0.11)         | rs14190931<br>9 | 2.83E-05            | 3.23E-05       | .              | 0,42,0.58<br>,T | 0.935,D     | 1.000,1.000,<br>D    | 0.27        | 0.007  | 23.2             |
| <i>TEKT5</i>   | NM_144674:<br>ex4:c.727C>T:<br>p.R243W                                               | het<br>(0.13)         | rs14102918<br>9 | 3.78E-05            | 6.47E-05       | .              | 0,1.00,D        | 0.996,D     | 1.000,1.000,<br>D    | 0.316       | 0.044  | 29.1             |
| <i>ABHD8</i>   | NM_024527:<br>ex2:c.439C>T:<br>p.R147W                                               | het<br>(0.17)         | .               | .                   | .              | .              | 0,04,0.96<br>,D | 0.548,P     | 0.991,0.009,<br>N    | 0.088       | 0.108  | 28.8             |

| Gene           | Gene Info                                                                               | III-1<br>CPP<br>(VAF) | rsID138         | ExacNoTC<br>GA_MAF* | gnomad<br>MAF* | COSMIC_I<br>D                       | SIFT**         | Polyphen2** | Mutation<br>Taster** | Revel*<br>* | MCAP** | CADD_p<br>hred** |
|----------------|-----------------------------------------------------------------------------------------|-----------------------|-----------------|---------------------|----------------|-------------------------------------|----------------|-------------|----------------------|-------------|--------|------------------|
| <i>NXPH2</i>   | NM_007226:<br>ex2:c.263C>T:<br>p.T88M                                                   | het<br>(0.14)         | .               | .                   | .              | .                                   | .              | 0.984,D     | 1.000,1.000,<br>D    | 0.263       | 0.010  | 27.9             |
| <i>ARFIP1</i>  | NM_014447:<br>ex7:c.716G>A:<br>p.R239H                                                  | het<br>(0.15)         | .               | .                   | 3.23E-05       | COSM105<br>2172,<br>COSM105<br>2173 | 0,1,0.90,<br>T | 1.0,D       | 1,1.0,D              | 0.786       | 0.112  | 34               |
| <i>P4HA2</i>   | NM_001142599:<br>ex3:c.82+5G>A,<br>NM_001017974:<br>ex2:c.82+5G>A                       | het<br>(0.14)         | .               | 9.63E-06            | .              | .                                   | .              | .           | .                    | .           | .      | .                |
| <i>COL12A1</i> | NM_080645:<br>ex20:c.2401C>T:<br>p.R801C,<br>NM_004370:<br>ex35:c.5893C>T:<br>p.R1965C  | het<br>(0.15)         | rs20048739<br>6 | 1.00E-04            | 1.00E-04       | COSM229<br>731                      | 0,1.00,D       | 0.976,D     | 1.000,1.000,<br>D    | 0.811       | 0.080  | 23.6             |
| <i>NUDCD3</i>  | NM_015332:<br>ex5:c.975+5G>A                                                            | het<br>(0.13)         | .               | .                   | .              | .                                   | .              | .           | .                    | .           | .      | .                |
| <i>RCAN3</i>   | NM_001251984:<br>ex4:c.211G>A:p.V71<br>M                                                | het<br>(0.13)         | rs20130557<br>7 | .                   | 3.23E-05       | .                                   | 0,1.00,D       | 1.0,D       | 1,1.0,D              | 0.484       | 0.102  | 33               |
| <i>ACP2</i>    | NM_001610:ex4:c.31<br>4C>T:<br>p.T105I                                                  | het<br>(0.10)         | .               | .                   | .              | .                                   | 0,1.00,D       | 1.0,D       | 1,1.0,D              | 0.715       | 0.043  | 29.5             |
| <i>STRN3</i>   | NM_014574:<br>ex9:c.1147C>T:<br>p.R383X,<br>NM_001083893:<br>ex11:c.1399C>T:<br>p.R467X | het<br>(0.19)         | .               | .                   | .              | COSM341<br>9762,<br>COSM341<br>9763 | .              | .           | .                    | .           | .      | 39               |
| <i>CHD3</i>    | NM_001005271:<br>ex1:c.219_220insCC<br>G:<br>p.F73delinsFP                              | het<br>(0.57)         | .               | .                   | 0.0119         | .                                   | .              | .           | .                    | .           | .      | .                |

| Gene            | Gene Info                                 | III-1<br>CPP<br>(VAF) | rsID138         | ExacNoTC<br>GA_MAF* | gnomad<br>MAF* | COSMIC_I<br>D                       | SIFT**          | Polyphen2** | Mutation<br>Taster** | Revel*<br>* | MCAP** | CADD_p<br>hred** |
|-----------------|-------------------------------------------|-----------------------|-----------------|---------------------|----------------|-------------------------------------|-----------------|-------------|----------------------|-------------|--------|------------------|
| <i>ARHGAP40</i> | NM_001164431:<br>ex2:c.337+5G>A           | het<br>(0.14)         | .               | .                   | .              | .                                   | .               | .           | .                    | .           | .      | .                |
| <i>MST1</i>     | NM_020998:<br>ex15:c.1640G>T:<br>p.G547V  | het<br>(0.16)         | .               | .                   | .              | .                                   | 0.17,0.83<br>,T | 1.0,D       | 1,1.0,D              | 0.727       | 0.140  | 25.8             |
| <i>PDLIM5</i>   | NM_001256428:<br>ex5:c.370C>T:<br>p.R124C | het<br>(0.11)         | rs20189105<br>4 | 3.77E-05            | 6.51E-05       | COSM143<br>1851,<br>COSM143<br>1852 | 0.17,0.83<br>,T | 0.764,P     | 0.963,0.963,<br>D    | 0.066       | 0.019  | 24.4             |
| <i>MRRF</i>     | NM_199177:<br>ex5:c.587G>A:<br>p.W196X    | het<br>(0.11)         | .               | .                   | .              | .                                   | .               | .           | .                    | .           | .      | 11.41            |
| <i>MLXIP</i>    | NM_014938:<br>ex6:c.902G>A:<br>p.R301Q    | het<br>(0.15)         | .               | .                   | .              | .                                   | 0.11,0.89<br>,T | 0.99,D      | 1,1.0,D              | 0.158       | 0.022  | 32               |
| <i>RHPN2</i>    | NM_033103:<br>ex3:c.217G>A:<br>p.V73M     | het<br>(0.10)         | .               | 9.00E-04            | .              | .                                   | 0,1.00,D        | 0.984,D     | 1,1.0,D              | 0.334       | 0.075  | 26.9             |

\* Minor allele frequency (MAF) in Non-TCGA ExAC (The Exome Aggregation Consortium; <http://exac.broadinstitute.org/>), gnomAD (<http://gnomad.broadinstitute.org/>).

\*\* Functional impact prediction results of 6 bioinformatics algorithms. The Revel score changes between 0 to 1 and more damaging variants have higher scores. CADD score  $\geq 20$  indicates deleterious variants.

**Supplementary Table 6.** Coverage results for the WES experiment in the 6 tumors (4 schwannomas from individual II-2, 1 schwannoma from individual I-1 and 1 CPP from III-1)

| Sample_id  | Mean   | %CCDS bases<br>≥ 5x coverage | %CCDS bases<br>≥ 10x coverage | %CCDS bases<br>≥ 20x coverage | %CCDS bases<br>≥ 50x coverage |
|------------|--------|------------------------------|-------------------------------|-------------------------------|-------------------------------|
| II-2-Schw1 | 136    | 98.3                         | 98.0                          | 97.4                          | 92.3                          |
| II-2-Schw2 | 196    | 98.4                         | 98.2                          | 97.9                          | 95.9                          |
| II-2-Schw3 | 194    | 98.4                         | 98.2                          | 97.9                          | 95.7                          |
| II-2-Schw4 | 187    | 98.4                         | 98.2                          | 97.8                          | 95.2                          |
| III-1-CPP  | 93     | 96.4                         | 93.9                          | 88.8                          | 70.1                          |
| I-1-Schw   | 292.95 | 98.4                         | 98.1                          | 97.5                          | 94.6                          |

**Supplementary Table 7.** Summary of the Sequencing Methods for all Tumors and blood from MNG patients

| DGCR8 screening                | Number of samples |             |                 |                        |            |
|--------------------------------|-------------------|-------------|-----------------|------------------------|------------|
|                                | CPTs              | Schwannomas | MNGs (germline) | Benign Thyroid nodules | PTC        |
| Fluidigm                       | 50                | 56*         | 7               | NA                     | NA         |
| Haloplex <sup>HS</sup>         | NA                | 61**        | 1               | NA                     | NA         |
| WES                            | 24                | NA          | 4***            | NA                     | NA         |
| Sanger sequencing<br>Full Gene | NA                | 64          | 6               | NA                     | NA         |
| Sanger sequencing<br>E518K     | NA                | NA          | NA              | 106                    | 315        |
| <b>Total</b>                   | <b>74</b>         | <b>181</b>  | <b>18</b>       | <b>106</b>             | <b>315</b> |

\* 11 cases were sequenced by Fluidigm in parallel with the Haloplex<sup>HS</sup> experiment. \*\* 11 cases were also sequenced using the Fluidigm assay to test the capture results from the Haloplex<sup>HS</sup> experiment. NA : not done; CPTs; Choroid plexus tumors; MNGs: Multinodular goiters. \*\*\* only probands are included; PTC: Papillary thyroid cancers.

**Supplementary Table 8. *DGCR8* Sequencing Summary of *DGCR8* (NM\_022720) for all sporadic CPTs and schwannomas**

| Sample ID      | TUMOR TYPE    | Variant              | Predictors                |                  |                  |                   |      | MAF      |              | Sequencing method |
|----------------|---------------|----------------------|---------------------------|------------------|------------------|-------------------|------|----------|--------------|-------------------|
|                |               |                      | PPH2                      | SIFT             | PROVEAN          | Mutation Assessor | CADD | gnomAD   | 1000 Genomes |                   |
| <b>CPT438*</b> | WHO-III (CPC) | c.1763A>G, p.(K588R) | 0.985 (probably damaging) | 0.13 (tolerated) | -0.695 (Neutral) | 0.550 (neutral)   | 24.9 | 0.005920 | 0.0034       | Fluidigm          |

\* CPT438 has LOH

| Sample ID       | TUMOR TYPE           | Variant              | Predictors                |                   |                  |                   |       | MAF      |              | Sequencing method |
|-----------------|----------------------|----------------------|---------------------------|-------------------|------------------|-------------------|-------|----------|--------------|-------------------|
|                 |                      |                      | PPH2                      | SIFT              | PROVEAN          | Mutation Assessor | CADD  | gnomAD   | 1000 Genomes |                   |
| <b>Schw42</b>   | Primary tumor        | c.1763A>G, p.(K588R) | 0.637 (probably damaging) | 0.13 (tolerated)  | -0.695 (Neutral) | 0.550 (neutral)   | 24.9  | 0.005920 | 0.0034       | Fluidigm          |
| <b>Schw62</b>   | Primary tumor        | c.1763A>G, p.(K588R) | 0.637 (probably damaging) | 0.13 (tolerated)  | -0.695 (Neutral) | 0.550 (neutral)   | 24.9  | 0.005920 | 0.0034       | Sanger            |
| <b>Schw66</b>   | Primary tumor        | c.1147A>G, p.(S383G) | 0.000 (benign)            | 0.514 (tolerated) | 0.114 (Neutral)  | 0.345 (neutral)   | 14.29 | N/A      | N/A          | Haloplex          |
| <b>Schw67</b>   | Recurrence of schw62 | c.1763A>G, p.(K588R) | 0.637 (probably damaging) | 0.13 (tolerated)  | -0.695 (Neutral) | 0.550 (neutral)   | 24.9  | 0.005920 | 0.0034       | Haloplex          |
| <b>Schw137</b>  | Primary tumor        | c.1763A>G, p.(K588R) | 0.637 (probably damaging) | 0.13 (tolerated)  | -0.695 (Neutral) | 0.550 (neutral)   | 24.9  | 0.005920 | 0.0034       | Sanger            |
| <b>Schw164*</b> | Multiple tumors      | c.1763A>G, p.(K588R) | 0.637 (probably damaging) | 0.13 (tolerated)  | -0.695 (Neutral) | 0.550 (neutral)   | 24.9  | 0.005920 | 0.0034       | Sanger            |
| <b>Schw165*</b> | Multiple tumors      | c.1763A>G, p.(K588R) | 0.637 (probably damaging) | 0.13 (tolerated)  | -0.695 (Neutral) | 0.550 (neutral)   | 24.9  | 0.005920 | 0.0034       | Sanger            |

\* Schw164 and schw165 are from the same patient, which suggests the variant c.1763A>G;p.K588R is a germline variant. **DGCR8 MNGs series:** No variant in *DGCR8* was found in germline DNA from the 18 MNG cases with a suspected hereditary origin.

**Supplementary Table 9. Differentially expressed miRNAs in DGCR8 mutated vs DGCR8 wild type schwannomas**

| ID             | Name             | logFC | AveExpr | t      | P.Value  | adj.P.Val |
|----------------|------------------|-------|---------|--------|----------|-----------|
| MIMAT0004550   | hsa-miR-30c-2-3p | -3.60 | 7.11    | -12.93 | 7.27E-08 | 2.94E-05  |
| MIMAT0003885   | hsa-miR-454-3p   | -3.53 | 5.47    | -12.67 | 8.91E-08 | 2.94E-05  |
| MIMAT0000222   | hsa-miR-192-5p   | -3.57 | 6.92    | -12.62 | 9.32E-08 | 2.94E-05  |
| MIMAT0000275   | hsa-miR-218-5p   | -3.39 | 9.51    | -11.68 | 2.03E-07 | 3.60E-05  |
| MIMAT0004956   | hsa-miR-374b-3p  | -3.33 | 3.08    | -10.71 | 4.77E-07 | 5.68E-05  |
| MIMAT0000244   | hsa-miR-30c-5p   | -2.09 | 11.78   | -10.58 | 5.39E-07 | 5.68E-05  |
| MIMAT0003249   | hsa-miR-584-5p   | -5.37 | 5.78    | -10.18 | 7.83E-07 | 6.76E-05  |
| MIMAT0004810   | hsa-miR-629-5p   | -3.55 | 6.67    | -9.60  | 1.39E-06 | 9.55E-05  |
| MIMAT0013517   | hsa-miR-2682-5p  | -7.43 | 0.54    | -9.58  | 1.41E-06 | 9.55E-05  |
| MIMAT0004505   | hsa-miR-32-3p    | -3.40 | 2.83    | -9.50  | 1.54E-06 | 9.74E-05  |
| MIMAT0000460_1 | hsa-miR-194-5p   | -2.18 | 5.85    | -9.09  | 2.35E-06 | 1.07E-04  |
| MIMAT0000772   | hsa-miR-345-5p   | -2.29 | 5.99    | -8.98  | 2.64E-06 | 1.07E-04  |
| MIMAT0019047   | hsa-miR-4510     | -3.83 | 1.34    | -8.97  | 2.67E-06 | 1.07E-04  |
| MIMAT0003886   | hsa-miR-769-5p   | -2.05 | 7.29    | -8.90  | 2.88E-06 | 1.07E-04  |
| MIMAT0005825   | hsa-miR-1180-3p  | -2.90 | 5.37    | -8.78  | 3.27E-06 | 1.07E-04  |
| MIMAT0004784   | hsa-miR-455-3p   | -3.80 | 5.34    | -8.76  | 3.33E-06 | 1.07E-04  |
| MIMAT0000692   | hsa-miR-30e-5p   | -2.50 | 10.53   | -8.74  | 3.42E-06 | 1.07E-04  |
| MIMAT0005796   | hsa-miR-1271-5p  | -2.96 | 4.82    | -8.49  | 4.49E-06 | 1.14E-04  |
| MIMAT0004565   | hsa-miR-218-1-3p | -3.99 | 1.09    | -8.44  | 4.74E-06 | 1.15E-04  |
| MIMAT0004955   | hsa-miR-374b-5p  | -3.21 | 7.82    | -8.30  | 5.54E-06 | 1.28E-04  |
| MIMAT0018443   | hsa-miR-374c-5p  | -4.46 | -0.05   | -8.26  | 5.79E-06 | 1.28E-04  |
| MIMAT0000693   | hsa-miR-30e-3p   | -1.86 | 8.75    | -8.18  | 6.34E-06 | 1.29E-04  |
| MIMAT0000090   | hsa-miR-32-5p    | -3.48 | 6.80    | -8.06  | 7.32E-06 | 1.36E-04  |
| MIMAT0004486   | hsa-let-7f-1-3p  | -2.80 | 3.49    | -8.01  | 7.72E-06 | 1.38E-04  |
| MIMAT0022706   | hsa-miR-561-5p   | -4.45 | -0.69   | -8.01  | 7.73E-06 | 1.38E-04  |
| MIMAT0027663   | hsa-miR-6881-3p  | 4.40  | 1.51    | 11.54  | 2.28E-07 | 3.60E-05  |
| MIMAT0030417   | hsa-miR-6516-5p  | 3.89  | 2.67    | 10.18  | 7.86E-07 | 6.76E-05  |
| MIMAT0019859   | hsa-miR-4734     | 4.74  | -1.45   | 9.75   | 1.20E-06 | 9.45E-05  |
| MIMAT0027632   | hsa-miR-6866-5p  | 2.66  | 1.93    | 9.23   | 2.03E-06 | 1.07E-04  |
| MIMAT0004515   | hsa-miR-29b-2-5p | 2.83  | 6.55    | 9.12   | 2.26E-06 | 1.07E-04  |
| MIMAT0018997   | hsa-miR-4470     | 3.17  | 2.11    | 9.07   | 2.39E-06 | 1.07E-04  |
| MIMAT0025852   | hsa-miR-6721-5p  | 3.64  | 0.04    | 8.95   | 2.73E-06 | 1.07E-04  |
| MIMAT0005584   | hsa-miR-1229-3p  | 3.81  | 1.46    | 8.77   | 3.29E-06 | 1.07E-04  |
| MIMAT0025479   | hsa-miR-6511a-3p | 2.56  | 2.84    | 8.68   | 3.63E-06 | 1.07E-04  |
| MIMAT0005911   | hsa-miR-1260a    | 3.52  | 4.44    | 8.65   | 3.76E-06 | 1.08E-04  |
| MIMAT0004950   | hsa-miR-877-3p   | 4.31  | 1.90    | 8.54   | 4.24E-06 | 1.14E-04  |
| MIMAT0000080   | hsa-miR-24-3p    | 1.71  | 14.08   | 8.53   | 4.29E-06 | 1.14E-04  |
| MIMAT0005591   | hsa-miR-1236-3p  | 3.78  | -1.17   | 8.47   | 4.56E-06 | 1.14E-04  |
| MIMAT0027573   | hsa-miR-6780b-3p | 4.22  | -1.09   | 8.32   | 5.39E-06 | 1.28E-04  |
| MIMAT0025845   | hsa-miR-6716-3p  | 3.16  | 3.02    | 8.28   | 5.66E-06 | 1.28E-04  |

| ID           | Name             | logFC | AveExpr | t    | P.Value  | adj.P.Val |
|--------------|------------------|-------|---------|------|----------|-----------|
| MIMAT0027645 | hsa-miR-6872-3p  | 3.21  | -0.25   | 8.22 | 6.10E-06 | 1.29E-04  |
| MIMAT0015041 | hsa-miR-1260b    | 3.77  | 5.13    | 8.20 | 6.23E-06 | 1.29E-04  |
| MIMAT0002808 | hsa-miR-511-5p   | 3.90  | 3.60    | 8.15 | 6.55E-06 | 1.29E-04  |
| MIMAT0004693 | hsa-miR-330-5p   | 2.57  | 5.94    | 8.10 | 6.99E-06 | 1.33E-04  |
| MIMAT0019873 | hsa-miR-4742-3p  | 2.94  | 0.92    | 8.09 | 7.02E-06 | 1.33E-04  |
| MIMAT0000273 | hsa-miR-216a-5p  | 6.56  | -1.06   | 7.94 | 8.40E-06 | 1.47E-04  |
| MIMAT0005580 | hsa-miR-1227-3p  | 3.66  | 0.95    | 7.83 | 9.50E-06 | 1.64E-04  |
| MIMAT0025848 | hsa-miR-6511b-3p | 2.35  | 2.99    | 7.68 | 1.14E-05 | 1.90E-04  |
| MIMAT0027554 | hsa-miR-6827-5p  | 2.97  | 0.28    | 7.63 | 1.21E-05 | 1.96E-04  |
| MIMAT0027567 | hsa-miR-6833-3p  | 2.62  | 1.10    | 7.62 | 1.22E-05 | 1.96E-04  |

Top 25 over- and under- expressed miRNA (blue and red respectively) from differential miRNA expression analysis between Schwannoma cases with and without *DGCR8* mutation (n total = 9), corresponding to the volcano plot shown in Figure 4B of the manuscript. logFC: log2 of Fold Change; AveExpr: normalized Average Expression across all samples; t: moderated t-statistics; FDR: False Discovery Rate.

### Supplementary Table 10. Differentially expressed mRNAs in DGCR8 mutated vs DGCR8 wild type schwannomas

| GeneNam         | EnsID           | logFC | AveExp | T      | P.Value  | FDR      |
|-----------------|-----------------|-------|--------|--------|----------|----------|
| <i>KRAS</i>     | ENSG00000133703 | 1.40  | 6.77   | 12.93  | 3.03E-07 | 1.27E-03 |
| <i>FAM102B</i>  | ENSG00000162636 | 1.29  | 5.92   | 9.00   | 6.90E-06 | 4.70E-03 |
| <i>SNN</i>      | ENSG00000184602 | 0.78  | 6.63   | 8.97   | 7.11E-06 | 4.70E-03 |
| <i>TMEM139</i>  | ENSG00000178826 | 3.06  | 2.79   | 8.85   | 7.98E-06 | 4.70E-03 |
| <i>SIGMAR1</i>  | ENSG00000147955 | 1.19  | 5.43   | 8.41   | 1.22E-05 | 5.75E-03 |
| <i>RAP2C</i>    | ENSG00000123728 | 0.86  | 5.64   | 7.93   | 1.98E-05 | 5.89E-03 |
| <i>ERGIC2</i>   | ENSG00000087502 | 1.24  | 6.56   | 7.78   | 2.31E-05 | 5.89E-03 |
| <i>NRAS</i>     | ENSG00000213281 | 1.10  | 6.27   | 7.74   | 2.42E-05 | 5.89E-03 |
| <i>L1TD1</i>    | ENSG00000240563 | 2.94  | 3.68   | 7.75   | 2.39E-05 | 5.89E-03 |
| <i>CNEP1R1</i>  | ENSG00000205423 | 0.66  | 4.46   | 7.59   | 2.83E-05 | 5.94E-03 |
| <i>TGIF2</i>    | ENSG00000118707 | 0.70  | 5.30   | 7.58   | 2.88E-05 | 5.94E-03 |
| <i>COMMD3</i>   | ENSG00000148444 | 0.79  | 4.19   | 7.53   | 3.03E-05 | 5.94E-03 |
| <i>CBR3</i>     | ENSG00000159231 | 0.83  | 3.89   | 7.22   | 4.24E-05 | 7.14E-03 |
| <i>CDC23</i>    | ENSG00000094880 | 0.95  | 5.13   | 7.13   | 4.65E-05 | 7.46E-03 |
| <i>PLK2</i>     | ENSG00000145632 | 2.07  | 7.46   | 7.08   | 4.98E-05 | 7.46E-03 |
| <i>RBM3</i>     | ENSG00000102317 | 0.97  | 7.81   | 7.05   | 5.10E-05 | 7.46E-03 |
| <i>MYL12B</i>   | ENSG00000118680 | 0.93  | 7.28   | 7.04   | 5.17E-05 | 7.46E-03 |
| <i>CDC42</i>    | ENSG00000070831 | 0.90  | 7.98   | 6.92   | 5.96E-05 | 8.42E-03 |
| <i>RAP2B</i>    | ENSG00000181467 | 1.02  | 6.50   | 6.63   | 8.26E-05 | 9.05E-03 |
| <i>FLJ27365</i> | ENSG00000197182 | 1.97  | 6.46   | 6.39   | 1.11E-04 | 1.09E-02 |
| <i>SPCS3</i>    | ENSG00000129128 | 0.70  | 7.25   | 6.27   | 1.28E-04 | 1.21E-02 |
| <i>TMEM33</i>   | ENSG00000109133 | 0.68  | 6.99   | 6.25   | 1.31E-04 | 1.22E-02 |
| <i>DUSP12</i>   | ENSG00000081721 | 0.77  | 4.15   | 6.19   | 1.42E-04 | 1.25E-02 |
| <i>METRNL</i>   | ENSG00000176845 | 1.10  | 6.72   | 6.15   | 1.49E-04 | 1.25E-02 |
| <i>CCDC50</i>   | ENSG00000152492 | 0.68  | 7.29   | 6.09   | 1.61E-04 | 1.25E-02 |
| <i>ZBTB16</i>   | ENSG00000109906 | -3.12 | 6.41   | -12.15 | 5.24E-07 | 1.27E-03 |

| GeneNam         | EnsID           | logFC | AveExp | T      | P.Value  | FDR      |
|-----------------|-----------------|-------|--------|--------|----------|----------|
| <i>ATAD3B</i>   | ENSG00000160072 | -1.48 | 4.21   | -11.47 | 8.65E-07 | 1.53E-03 |
| <i>GBP3</i>     | ENSG00000117226 | -2.07 | 5.18   | -11.04 | 1.21E-06 | 1.71E-03 |
| <i>GPR83</i>    | ENSG00000123901 | -5.05 | 3.85   | -12.11 | 5.38E-07 | 1.27E-03 |
| <i>SAFB2</i>    | ENSG00000130254 | -1.29 | 6.05   | -10.45 | 1.94E-06 | 2.28E-03 |
| <i>SEC14L1</i>  | ENSG00000129657 | -1.72 | 7.40   | -9.32  | 5.14E-06 | 4.70E-03 |
| <i>KCNJ2</i>    | ENSG00000123700 | -1.44 | 3.37   | -9.09  | 6.34E-06 | 4.70E-03 |
| <i>SERPINA5</i> | ENSG00000188488 | -2.68 | 6.23   | -8.88  | 7.75E-06 | 4.70E-03 |
| <i>ECHDC2</i>   | ENSG00000121310 | -2.16 | 5.43   | -8.66  | 9.52E-06 | 4.80E-03 |
| <i>ZFAND5</i>   | ENSG00000107372 | -2.29 | 9.25   | -8.67  | 9.47E-06 | 4.80E-03 |
| <i>NEK9</i>     | ENSG00000119638 | -0.76 | 6.88   | -8.30  | 1.36E-05 | 5.81E-03 |
| <i>FKBP5</i>    | ENSG00000096060 | -2.58 | 8.41   | -8.27  | 1.40E-05 | 5.81E-03 |
| <i>TSC22D3</i>  | ENSG00000157514 | -1.94 | 8.16   | -8.19  | 1.52E-05 | 5.89E-03 |
| <i>BEX4</i>     | ENSG00000102409 | -1.70 | 4.72   | -7.94  | 1.95E-05 | 5.89E-03 |
| <i>NBPF14</i>   | ENSG00000122497 | -3.39 | 3.93   | -7.95  | 1.94E-05 | 5.89E-03 |
| <i>GCC2</i>     | ENSG00000135968 | -0.72 | 6.81   | -7.89  | 2.06E-05 | 5.89E-03 |
| <i>DCXR</i>     | ENSG00000169738 | -1.17 | 3.40   | -7.85  | 2.15E-05 | 5.89E-03 |
| <i>SULT1A1</i>  | ENSG00000196502 | -3.15 | 3.34   | -7.84  | 2.18E-05 | 5.89E-03 |
| <i>ZNF812</i>   | ENSG00000224689 | -3.20 | 2.38   | -7.81  | 2.23E-05 | 5.89E-03 |
| <i>ZDBF2</i>    | ENSG00000204186 | -1.62 | 4.94   | -7.58  | 2.86E-05 | 5.94E-03 |
| <i>OLR1</i>     | ENSG00000173391 | -2.97 | 4.81   | -7.55  | 2.95E-05 | 5.94E-03 |
| <i>CEBPB</i>    | ENSG00000172216 | -1.78 | 6.04   | -7.57  | 2.89E-05 | 5.94E-03 |
| <i>PKD4</i>     | ENSG00000004799 | -2.36 | 9.09   | -7.54  | 2.99E-05 | 5.94E-03 |
| <i>BAIAP2</i>   | ENSG00000175866 | -1.90 | 5.50   | -7.45  | 3.30E-05 | 6.31E-03 |
| <i>VMP1</i>     | ENSG00000062716 | -2.00 | 8.74   | -7.38  | 3.54E-05 | 6.58E-03 |

Top 25 over- and under-expressed mRNA (red and blue respectively) from differential mRNA expression analysis between Schwannoma cases with and without *DGCR8* mutation (n total = 9), corresponding to the volcano plot shown in Figure 4A of the manuscript. logFC log2 of Fold Change; AveExpr corresponds to normalized Average Expression across all samples; t = moderated t-statistics; FDR False Discovery Rate.

### Supplementary Table 11. Differentially expressed miRNAs in DGCR8 mutated vs DGCR8 wild type Wilms Tumors

| ID             | Name            | logFC | AveExpr | t      | P.Value  | FDR      |
|----------------|-----------------|-------|---------|--------|----------|----------|
| MIMAT0000772   | hsa-miR-345-5p  | -4.38 | 3.89    | -10.63 | 4.27E-11 | 2.74E-08 |
| MIMAT0000692   | hsa-miR-30e-5p  | -2.47 | 11.72   | -9.06  | 1.23E-09 | 2.62E-07 |
| MIMAT0003322   | hsa-miR-652-3p  | -2.51 | 4.18    | -8.50  | 4.40E-09 | 7.06E-07 |
| MIMAT0000693   | hsa-miR-30e-3p  | -2.60 | 11.58   | -8.29  | 7.27E-09 | 8.96E-07 |
| MIMAT0004955   | hsa-miR-374b-5p | -2.79 | 4.99    | -7.98  | 1.52E-08 | 1.22E-06 |
| MIMAT0002876   | hsa-miR-505-3p  | -2.89 | 4.74    | -7.48  | 5.10E-08 | 2.04E-06 |
| MIMAT0004680   | hsa-miR-130b-5p | -4.44 | 5.29    | -7.45  | 5.44E-08 | 2.05E-06 |
| MIMAT0003885   | hsa-miR-454-3p  | -2.84 | 4.39    | -7.30  | 7.99E-08 | 2.69E-06 |
| MIMAT0004697   | hsa-miR-151a-5p | -2.07 | 6.96    | -7.12  | 1.25E-07 | 3.96E-06 |
| MIMAT0000257_1 | hsa-miR-181b-5p | -2.81 | 9.91    | -6.88  | 2.27E-07 | 6.61E-06 |
| MIMAT0022726   | hsa-miR-1306-5p | -3.49 | 2.57    | -6.75  | 3.16E-07 | 8.45E-06 |

| ID           | Name             | logFC | AveExpr | t     | P.Value  | FDR      |
|--------------|------------------|-------|---------|-------|----------|----------|
| MIMAT0005794 | hsa-miR-1296-5p  | -3.30 | 3.90    | -6.68 | 3.74E-07 | 9.60E-06 |
| MIMAT0004911 | hsa-miR-874-3p   | -2.66 | 4.75    | -6.56 | 5.17E-07 | 1.27E-05 |
| MIMAT0003218 | hsa-miR-92b-3p   | -2.71 | 6.60    | -6.33 | 9.43E-07 | 1.75E-05 |
| MIMAT0001080 | hsa-miR-196b-5p  | -3.39 | 11.40   | -6.31 | 9.85E-07 | 1.75E-05 |
| MIMAT0000222 | hsa-miR-192-5p   | -3.03 | 7.30    | -6.28 | 1.07E-06 | 1.79E-05 |
| MIMAT0004502 | hsa-miR-28-3p    | -2.08 | 10.38   | -6.27 | 1.09E-06 | 1.79E-05 |
| MIMAT0000447 | hsa-miR-134-5p   | -3.02 | 7.76    | -6.16 | 1.44E-06 | 2.20E-05 |
| MIMAT0000754 | hsa-miR-337-3p   | -2.44 | 5.14    | -5.93 | 2.67E-06 | 3.81E-05 |
| MIMAT0000090 | hsa-miR-32-5p    | -2.17 | 3.91    | -5.82 | 3.50E-06 | 4.78E-05 |
| MIMAT0000758 | hsa-miR-135b-5p  | -3.86 | 5.15    | -5.79 | 3.80E-06 | 5.08E-05 |
| MIMAT0003258 | hsa-miR-590-5p   | -2.90 | 2.64    | -5.76 | 4.15E-06 | 5.29E-05 |
| MIMAT0006789 | hsa-miR-1468-5p  | -3.54 | 2.29    | -5.75 | 4.29E-06 | 5.29E-05 |
| MIMAT0005920 | hsa-miR-1266-5p  | -3.13 | 2.09    | -5.75 | 4.29E-06 | 5.29E-05 |
| MIMAT0019208 | hsa-miR-3074-5p  | -4.26 | 2.26    | -5.70 | 4.89E-06 | 5.91E-05 |
| MIMAT0005584 | hsa-miR-1229-3p  | 4.46  | 0.69    | 9.31  | 7.14E-10 | 2.29E-07 |
| MIMAT0030020 | hsa-miR-7705     | 3.67  | -1.10   | 8.23  | 8.39E-09 | 8.96E-07 |
| MIMAT0004515 | hsa-miR-29b-2-5p | 3.14  | 2.76    | 8.15  | 1.01E-08 | 9.26E-07 |
| MIMAT0027577 | hsa-miR-6837-3p  | 3.26  | -0.26   | 7.89  | 1.90E-08 | 1.35E-06 |
| MIMAT0027410 | hsa-miR-6755-5p  | 3.51  | -0.57   | 7.80  | 2.34E-08 | 1.50E-06 |
| MIMAT0005949 | hsa-miR-664a-3p  | 2.97  | 3.59    | 7.70  | 2.96E-08 | 1.72E-06 |
| MIMAT0027513 | hsa-miR-6806-3p  | 2.17  | 1.23    | 7.67  | 3.23E-08 | 1.72E-06 |
| MIMAT0019845 | hsa-miR-4726-5p  | 3.24  | -0.58   | 7.59  | 3.92E-08 | 1.92E-06 |
| MIMAT0027691 | hsa-miR-6895-3p  | 3.91  | -1.61   | 7.55  | 4.26E-08 | 1.92E-06 |
| MIMAT0018001 | hsa-miR-3620-3p  | 3.83  | -0.18   | 7.53  | 4.50E-08 | 1.92E-06 |
| MIMAT0000751 | hsa-miR-330-3p   | 2.79  | 0.83    | 7.42  | 5.98E-08 | 2.13E-06 |
| MIMAT0018186 | hsa-miR-3912-3p  | 2.78  | 0.67    | 7.10  | 1.30E-07 | 3.96E-06 |
| MIMAT0022272 | hsa-miR-664b-3p  | 2.81  | -0.08   | 6.43  | 7.19E-07 | 1.66E-05 |
| MIMAT0004949 | hsa-miR-877-5p   | 2.94  | 2.91    | 6.42  | 7.37E-07 | 1.66E-05 |
| MIMAT0025845 | hsa-miR-6716-3p  | 3.13  | -1.25   | 6.41  | 7.58E-07 | 1.66E-05 |
| MIMAT0005577 | hsa-miR-1226-3p  | 3.57  | 4.12    | 6.40  | 7.79E-07 | 1.66E-05 |
| MIMAT0019873 | hsa-miR-4742-3p  | 2.98  | 0.37    | 6.36  | 8.56E-07 | 1.75E-05 |
| MIMAT0000443 | hsa-miR-125a-5p  | 1.81  | 10.09   | 6.31  | 9.75E-07 | 1.75E-05 |
| MIMAT0018962 | hsa-miR-4444     | 2.25  | -0.45   | 6.31  | 9.80E-07 | 1.75E-05 |
| MIMAT0005948 | hsa-miR-664a-5p  | 2.87  | 0.97    | 6.29  | 1.03E-06 | 1.79E-05 |
| MIMAT0004921 | hsa-miR-889-3p   | 2.89  | 4.69    | 6.25  | 1.14E-06 | 1.82E-05 |
| MIMAT0000753 | hsa-miR-342-3p   | 2.09  | 7.99    | 6.22  | 1.23E-06 | 1.92E-05 |
| MIMAT0027677 | hsa-miR-6888-3p  | 2.85  | -1.37   | 6.13  | 1.55E-06 | 2.32E-05 |
| MIMAT0002174 | hsa-miR-484      | 1.92  | 6.65    | 6.03  | 2.05E-06 | 2.98E-05 |
| MIMAT0015050 | hsa-miR-323b-3p  | 3.56  | 2.62    | 5.89  | 2.95E-06 | 4.11E-05 |

Top 25 over- and under- expressed miRNA (blue and red respectively) from differential miRNA expression analysis between Wilms Tumor cases with and without *DGCR8* mutation (n total = 24), corresponding to the volcano plot shown in Figure 4C of the manuscript. logFC: log2 of Fold Change; AveExpr: normalized Average Expression across all samples; t: moderated t-statistics; FDR: False Discovery Rate.

**Supplementary Table 12. Proportions of mirtrons within the total miRNA populations in DGCR8 or DICER1 mutated tumors compared to their wild types counterparts**

| Experiment | Total miRNAs expressed | Total mirtrons expressed | Higher in the mutant samples (FDR < 0.01) | Lower in the mutant samples (FDR < 0.01) |
|------------|------------------------|--------------------------|-------------------------------------------|------------------------------------------|
| DGCR8      | 871                    | 139 (16%)                | 113 (81%)                                 | 0 (0%)                                   |
| DICER1     | 825                    | 60 (7%)                  | 8 (13%)                                   | 5 (8%)                                   |

The percentage of mirtrons with higher/lower expression values (FDR < 0.01) in DGCR8 mutated schwannomas compared to wild types (Figure 4B; n sample = 9) and DICER1-mutated pituitary blastomas compared to DICER1 wild type (Supplementary Figure 14; n sample = 10). The data corresponds to the black dots in the corresponding figures.

**Supplementary Table 13. Hallmark gene set enrichment analysis for differentially expressed transcripts in DGCR8 mutated vs DGCR8 wild type schwannomas**

| NAME                               | SIZE | ES       | NES      | FDR      |
|------------------------------------|------|----------|----------|----------|
| HALLMARK_MYC_TARGETS_V1            | 169  | 0.407191 | 2.096808 | 4.86E-04 |
| HALLMARK_INTERFERON_GAMMA_RESPONSE | 121  | -0.45651 | -2.08793 | 0.001321 |
| HALLMARK_TNFA_SIGNALING_VIA_NFKB   | 127  | -0.44627 | -2.05127 | 7.62E-04 |
| HALLMARK_INTERFERON_ALPHA_RESPONSE | 66   | -0.46511 | -1.91045 | 0.00307  |
| HALLMARK_KRAS_SIGNALING_DN         | 34   | -0.53137 | -1.90191 | 0.002496 |

SIZE: number of genes in the gene set; ES: Enrichment score; NES: Normalized Enrichment Score across gene sets; FDR; False Discovery Rate.

**Supplementary Table 14. Primers used for amplification and sequencing of *DGCR8* gene in DNA of FFPE samples. cDNA-specific primers for amplification and sequencing of the E518K variant in cDNA are included at the bottom of the table**

| PRIMERS           | Exon     | SEQUENCE (5'-->3')             |
|-------------------|----------|--------------------------------|
| DGCR8-1-1-s       | 1        | GCT GTG TAG ATT TAT GTG AGG GC |
| DGCR8-1-1-as      | 1        | ACT GTC CAT CAC CAC CAG AG     |
| DGCR8-1-2-s       | 1        | GAG CTC GCC CCT TCC AAG        |
| DGCR8-1-2-as      | 1        | AGC AAC TTA AGG TCA GGG GA     |
| DGCR8-1-3-s       | 1        | TAG ACC CGA ACT GTA GTG GC     |
| DGCR8-1-3-as      | 1        | CAA CAC TCC CGC CAA AGG        |
| DGCR8-1-4-s       | 1        | GTG GGG ACG TGC ATG CTT        |
| DGCR8-1-4-as      | 1        | GCT GCA ATT CCC AAA TCT CTC TT |
| DGCR8-2-s         | 2        | TGC TGT TGA GCT CTC CTG TT     |
| DGCR8-2-as        | 2        | GGC ACC AGA GCT CTC TCA AA     |
| DGCR8-3-s         | 3        | GGA TGT TCT TGT CTT CCT GTG C  |
| DGCR8-3-as        | 3        | CAT GTG TGT GGA TGT GCA CG     |
| DGCR8-4-1-s       | 4        | GGA GGC ATC AGT CGT GAC TT     |
| DGCR8-4-1-as      | 4        | TTG ACG GGG GAC ACA TCC        |
| DGCR8-4-2-s       | 4        | GGA GCA AAG CAG TGA CCT CA     |
| DGCR8-4-2-as      | 4        | TCA TGG GTC CCA GGA GGC        |
| DGCR8-5-s         | 5        | GTT TCT CTG GTA AAT CTG GGA CA |
| DGCR8-5-as        | 5        | CAT GCC CTC AAC ACA TCA CA     |
| DGCR8-6-s         | 6        | GCC CCT AGT TAC TGA CAT GGT    |
| DGCR8-6-as        | 6        | CCC TGA CCA AAG TTA CAC CT     |
| DGCR8-7-s         | 7        | GAC TGT GCA CAC GCT TTT GA     |
| DGCR8-7-as        | 7        | CCA CTT GTC ACC ACT GCT CA     |
| DGCR8-8-s         | 8        | ACA GTT CAC TCT GCA GGG TG     |
| DGCR8-8-as        | 8        | CAG CTC ACA CTA ACA GGG CA     |
| DGCR8-9-s         | 9        | GTG GGG ACT CAC AAG CCT C      |
| DGCR8-9-as        | 9        | TGG GAC AAA CAG CCA CAA GA     |
| DGCR8-10-s        | 10       | AGA GCA GGC CTC CTC AGA G      |
| DGCR8-10-as       | 10       | CTG AGA CCA AGC CAC AGA GG     |
| DGCR8-11-s        | 11       | TGT GGG TCA GGA GGG CTG        |
| DGCR8-11-as       | 11       | AGA GCC TCA GGA ATA CGC TC     |
| DGCR8-12-s        | 12       | CTA CAG CCT GCA GTC CTG AG     |
| DGCR8-12-as       | 13       | ACA GGT GCC ACA GGA ATG G      |
| DGCR8-13-s        | 13       | CCT CCA CCT TGT GTC TTC CC     |
| DGCR8-13-as       | 13       | CTG GTC TCC TCA GAA GTG CG     |
| cDNA-DGCR8-518-S  | 6-7 cDNA | TTG CCA GCC AAT CAG AAG C      |
| cDNA-DGCR8-518-AS | 6-7 cDNA | AAG TCA GGG ATG AGG ATT TCC    |

## References:

1. Rudkin TM, Hamel N, Galvez M, Hogervorst F, Gille JJ, Moller P, et al. The frequent BRCA1 mutation 1135insA has multiple origins: a haplotype study in different populations. *BMC Med Genet.* 2006;7:15.
2. Sabbaghian N, Srivastava A, Hamel N, Plourde F, Gajtko-Metera M, Niedziela M, et al. Germ-line deletion in DICER1 revealed by a novel MLPA assay using synthetic oligonucleotides. *Eur J Hum Genet.* 2014;22(4):564-7.
3. de Kock L, Sabbaghian N, Druker H, Weber E, Hamel N, Miller S, et al. Germ-line and somatic DICER1 mutations in pineoblastoma. *Acta Neuropathol.* 2014;128(4):583-95.
4. Rivera BF, S; Rabinowicz, S; Watters, AK; Leventer, R; Levental, M; Khanna, M; Foulkes WD. SMO Syndrome: A Unifying Molecular Diagnosis That Suggests Therapeutic Opportunities. *JCO Precision Oncology:* 2, 1-6, 2018.
5. Wang K, Li M, and Hakonarson H. ANNOVAR: functional annotation of genetic variants from high-throughput sequencing data. *Nucleic Acids Res.* 2010;38(16):e164.
6. Schwarz JM, Rodelsperger C, Schuelke M, and Seelow D. MutationTaster evaluates disease-causing potential of sequence alterations. *Nat Methods.* 2010;7(8):575-6.
7. Kircher M, Witten DM, Jain P, O'Roak BJ, Cooper GM, and Shendure J. A general framework for estimating the relative pathogenicity of human genetic variants. *Nat Genet.* 2014;46(3):310-5.
8. Jagadeesh KA, Wenger AM, Berger MJ, Guturu H, Stenson PD, Cooper DN, et al. M-CAP eliminates a majority of variants of uncertain significance in clinical exomes at high sensitivity. *Nat Genet.* 2016;48(12):1581-6.
9. Rentzsch P, Witten D, Cooper GM, Shendure J, and Kircher M. CADD: predicting the deleteriousness of variants throughout the human genome. *Nucleic Acids Res.* 2019;47(D1):D886-D94.
10. Kumar P, Henikoff S, and Ng PC. Predicting the effects of coding non-synonymous variants on protein function using the SIFT algorithm. *Nat Protoc.* 2009;4(7):1073-81.
11. Adzhubei IA, Schmidt S, Peshkin L, Ramensky VE, Gerasimova A, Bork P, et al. A method and server for predicting damaging missense mutations. *Nat Methods.* 2010;7(4):248-9.
12. Robinson JT, Thorvaldsdottir H, Winckler W, Guttman M, Lander ES, Getz G, et al. Integrative genomics viewer. *Nat Biotechnol.* 2011;29(1):24-6.
13. Martin M. Cutadapt removes adapter sequences from high-throughput sequencing reads. *EMBnet journal.* 2011;17(1):pp-10.
14. Andrews S. FastQC A Quality Control tool for High Throughput Sequence Data. <http://www.bioinformaticsbabrahamacuk/projects/fastqc/>.
15. Langmead B, and Salzberg SL. Fast gapped-read alignment with Bowtie 2. *Nat Methods.* 2012;9(4):357-9.
16. Liao Y, Smyth GK, and Shi W. featureCounts: an efficient general purpose program for assigning sequence reads to genomic features. *Bioinformatics.* 2014;30(7):923-30.
17. Gentleman RC, Carey VJ, Bates DM, Bolstad B, Dettling M, Dudoit S, et al. Bioconductor: open software development for computational biology and bioinformatics. *Genome Biol.* 2004;5(10):R80.
18. Robinson MD, McCarthy DJ, and Smyth GK. edgeR: a Bioconductor package for differential expression analysis of digital gene expression data. *Bioinformatics.* 2010;26(1):139-40.
19. Ritchie ME, Phipson B, Wu D, Hu Y, Law CW, Shi W, et al. limma powers differential expression analyses for RNA-sequencing and microarray studies. *Nucleic Acids Res.* 2015;43(7):e47.
20. Law CW, Chen Y, Shi W, and Smyth GK. voom: Precision weights unlock linear model analysis tools for RNA-seq read counts. *Genome Biol.* 2014;15(2):R29.

21. Bolger AM, Lohse M, and Usadel B. Trimmomatic: a flexible trimmer for Illumina sequence data. *Bioinformatics*. 2014;30(15):2114-20.
22. Anders S, Pyl PT, and Huber W. HTSeq--a Python framework to work with high-throughput sequencing data. *Bioinformatics*. 2015;31(2):166-9.
23. Wilkerson MD, and Hayes DN. ConsensusClusterPlus: a class discovery tool with confidence assessments and item tracking. *Bioinformatics*. 2010;26(12):1572-3.
24. Subramanian A, Tamayo P, Mootha VK, Mukherjee S, Ebert BL, Gillette MA, et al. Gene set enrichment analysis: a knowledge-based approach for interpreting genome-wide expression profiles. *Proc Natl Acad Sci U S A*. 2005;102(43):15545-50.
25. Liberzon A, Birger C, Thorvaldsdottir H, Ghandi M, Mesirov JP, and Tamayo P. The Molecular Signatures Database (MSigDB) hallmark gene set collection. *Cell Syst*. 2015;1(6):417-25.
26. Whiffin N, Minikel E, Walsh R, O'Donnell-Luria AH, Karczewski K, Ing AY, et al. Using high-resolution variant frequencies to empower clinical genome interpretation. *Genet Med*. 2017;19(10):1151-8.

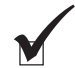

| Topic                           | Item       | Checklist item description                                                                                | Reported on Page                                                    |
|---------------------------------|------------|-----------------------------------------------------------------------------------------------------------|---------------------------------------------------------------------|
| <b>Title</b>                    | <b>1</b>   | The words “case report” should be in the title along with the area of focus .....                         | N/A                                                                 |
| <b>Key Words</b>                | <b>2</b>   | 2 to 5 key words that identify areas covered in this case report. ....                                    | 2                                                                   |
| <b>Abstract</b>                 | <b>3a</b>  | Introduction—What is unique about this case? What does it add to the medical literature? .....            | 3                                                                   |
|                                 | <b>3b</b>  | The main symptoms of the patient and the important clinical findings .....                                | 3                                                                   |
|                                 | <b>3c</b>  | The main diagnoses, therapeutics interventions, and outcomes .....                                        | 3                                                                   |
|                                 | <b>3d</b>  | Conclusion—What are the main “take-away” lessons from this case? .....                                    | 3                                                                   |
| <b>Introduction</b>             | <b>4</b>   | One or two paragraphs summarizing why this case is unique with references . . .                           | 5                                                                   |
| <b>Patient Information</b>      | <b>5a</b>  | De-identified demographic information and other patient specific information .....                        | 5 and Supplementary p3                                              |
|                                 | <b>5b</b>  | Main concerns and symptoms of the patient .....                                                           | 5 and Supplementary p3                                              |
|                                 | <b>5c</b>  | Medical, family, and psychosocial history including relevant genetic information (also see timeline). . . | 5 and Supplementary p3                                              |
|                                 | <b>5d</b>  | Relevant past interventions and their outcomes .....                                                      | 5 and Supplementary p3                                              |
| <b>Clinical Findings</b>        | <b>6</b>   | Describe the relevant physical examination (PE) and other significant clinical findings. ....             | 5 and Supplementary p3                                              |
| <b>Timeline</b>                 | <b>7</b>   | Important information from the patient’s history organized as a timeline .....                            | Figure 1 and Supplementary p3                                       |
| <b>Diagnostic Assessment</b>    | <b>8a</b>  | Diagnostic methods (such as PE, laboratory testing, imaging, surveys). ....                               | 5-7 and Supplementary 3,4,7 9                                       |
|                                 | <b>8b</b>  | Diagnostic challenges (such as access, financial, or cultural) .....                                      | N/A                                                                 |
|                                 | <b>8c</b>  | Diagnostic reasoning including other diagnoses considered .....                                           | 5-7 and Supplementary 3,4,7 9                                       |
|                                 | <b>8d</b>  | Prognostic characteristics (such as staging in oncology) where applicable .....                           | 5-7 and Supplementary 3,4,7 9                                       |
| <b>Therapeutic Intervention</b> | <b>9a</b>  | Types of intervention (such as pharmacologic, surgical, preventive, self-care) .....                      | 5-7 and Supplementary 3,4,7 9                                       |
|                                 | <b>9b</b>  | Administration of intervention (such as dosage, strength, duration) .....                                 | N/A                                                                 |
|                                 | <b>9c</b>  | Changes in intervention (with rationale) .....                                                            | N/A                                                                 |
| <b>Follow-up and Outcomes</b>   | <b>10a</b> | Clinician and patient-assessed outcomes (when appropriate) .....                                          | 5-7 and Supplementary 3,4,7 9                                       |
|                                 | <b>10b</b> | Important follow-up diagnostic and other test results .....                                               | 5-7 and Supplementary 3,4,7 9                                       |
|                                 | <b>10c</b> | Intervention adherence and tolerability (How was this assessed?) .....                                    | N/A                                                                 |
|                                 | <b>10d</b> | Adverse and unanticipated events .....                                                                    | N/A                                                                 |
| <b>Discussion</b>               | <b>11a</b> | Discussion of the strengths and limitations in your approach to this case .....                           | 10-14                                                               |
|                                 | <b>11b</b> | Discussion of the relevant medical literature. ....                                                       | 10-14                                                               |
|                                 | <b>11c</b> | The rationale for conclusions (including assessment of possible causes) .....                             | 10-14                                                               |
|                                 | <b>11d</b> | The primary “take-away” lessons of this case report .....                                                 | 13-14                                                               |
| <b>Patient Perspective</b>      | <b>12</b>  | When appropriate the patient should share their perspective on the treatments they received .....         | N/A                                                                 |
| <b>Informed Consent</b>         | <b>13</b>  | Did the patient give informed consent? Please provide if requested .....                                  | Yes <input checked="" type="checkbox"/> No <input type="checkbox"/> |
