# Supplementary material
Source: PubMed Central journal article supplement (PMC7269565)
Supplement: jci-130-130206-s224.pdf [file jci-130-130206-s224.pdf]

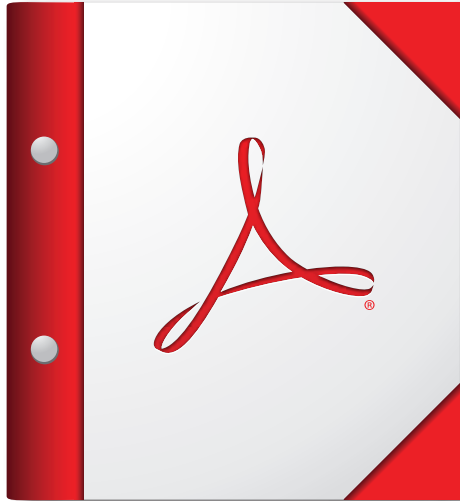

**For the best experience, open this PDF portfolio in  
Acrobat X or Adobe Reader X, or later.**

[Get Adobe Reader Now!](#)
